# Supplementary material for: Acetylene as an essential building block for prebiotic formation of pyrimidine bases on Titan
Source: Royal Society of Chemistry journal article supplement (doi:10.1039/c5cp03247d), 2015-01-01
Supplement: c5cp03247d1.pdf [file c5cp03247d1.pdf]

## Supporting Information

### Acetylene as an Essential Building Block for Prebiotic Formation of Pyrimidine Bases on Titan

Yassin A. Jeilani<sup>a,\*</sup> Chelesa Fearce,<sup>a</sup> Minh Tho Nguyen,<sup>b</sup>

<sup>a</sup> *Department Chemistry and Biochemistry, Spelman College, Atlanta, GA 30314, USA*

<sup>b</sup> *Department of Chemistry, University of Leuven, B-3001 Leuven, Belgium*

The supporting information includes: (1) coordinates for optimized geometries of all species, and (2) coordinates of geometries for all transition states.

#### Coordinates for optimized structures

##### Coordinates for 1

0 1

|   |             |             |             |
|---|-------------|-------------|-------------|
| C | 0.00000000  | 0.00000000  | 0.14633200  |
| N | 0.00000000  | 1.16210500  | -0.61336800 |
| H | 0.20664700  | 1.98663400  | -0.07038200 |
| H | 0.44978200  | 1.13290600  | -1.51633700 |
| N | 0.00000000  | -1.16210500 | -0.61336800 |
| H | -0.20664700 | -1.98663400 | -0.07038200 |
| H | -0.44978200 | -1.13290600 | -1.51633700 |
| O | 0.00000000  | 0.00000000  | 1.36032500  |

##### Coordinates for 2

0 2

|   |             |             |             |
|---|-------------|-------------|-------------|
| C | -0.05356900 | 0.07936500  | -0.01555300 |
| N | 1.26937400  | -0.23785300 | -0.05611900 |
| H | 1.93991600  | 0.50713300  | 0.04273200  |
| H | 1.55394900  | -1.18089800 | 0.15119300  |
| N | -0.90474800 | -1.02311000 | 0.06954200  |
| H | -1.77175600 | -0.75911900 | -0.40707500 |
| O | -0.49413500 | 1.22292900  | 0.02656200  |

##### Coordinates for 3

0 2

|   |             |             |             |
|---|-------------|-------------|-------------|
| C | 1.03687100  | -0.14402100 | 0.06971700  |
| N | -0.26993900 | -0.75845000 | -0.19979600 |

|   |             |             |             |
|---|-------------|-------------|-------------|
| C | -1.51762500 | -0.17193400 | -0.06180200 |
| N | -1.49594600 | 1.21747200  | -0.03027700 |
| H | -2.41725600 | 1.62129600  | -0.10976000 |
| H | -0.77096000 | 1.67740200  | -0.56748600 |
| O | -2.53804700 | -0.82350100 | 0.04356800  |
| H | -0.27913600 | -1.76605900 | -0.14133600 |
| N | 1.16835000  | 0.60014100  | 1.30593900  |
| H | 1.43378600  | -0.04327300 | 2.04349800  |
| H | 0.29081200  | 1.04794900  | 1.55387400  |
| N | 1.34844700  | 0.78022500  | -1.03986400 |
| H | 2.22939000  | 1.25284700  | -0.86098900 |
| H | 1.34690400  | 0.29804400  | -1.93438400 |
| O | 2.01237200  | -1.06002300 | -0.07893400 |

#### Coordinates for **4**

0 1

|   |             |             |             |
|---|-------------|-------------|-------------|
| C | 1.19536700  | 0.07345900  | -0.01126900 |
| N | 0.01671100  | -0.65851400 | 0.01007700  |
| H | 0.05056300  | -1.66409400 | -0.06943400 |
| C | -1.32420600 | -0.18757900 | 0.00451500  |
| N | -1.46546700 | 1.15498700  | 0.06045500  |
| H | -2.40236700 | 1.51548800  | 0.00911200  |
| H | -0.64921100 | 1.75211300  | 0.01089600  |
| O | 1.24007000  | 1.29361400  | -0.04362200 |
| N | 2.33098000  | -0.70217200 | -0.03122100 |
| H | 2.31169100  | -1.64481900 | 0.32411000  |
| H | 3.18737600  | -0.19062400 | 0.11151300  |
| O | -2.22764300 | -0.99904600 | -0.03398600 |

#### Coordinates for **5a**

0 2

|   |             |             |             |
|---|-------------|-------------|-------------|
| C | 0.43011700  | -0.28544200 | -0.02840100 |
| N | -0.89659200 | -0.72868400 | 0.05699400  |
| H | -1.10093600 | -1.71528300 | -0.02918000 |
| C | -2.05081800 | 0.07198300  | 0.02437000  |
| N | -1.90022500 | 1.42771100  | 0.26635300  |
| H | -1.17018300 | 1.80734100  | -0.34793400 |
| O | 0.70791300  | 0.90076200  | -0.17958200 |
| N | 1.35896500  | -1.26897000 | 0.03599100  |
| H | 1.11862100  | -2.19102500 | 0.35949700  |
| H | 2.33976900  | -0.96030400 | 0.06136000  |
| O | -3.14255700 | -0.43229600 | -0.14591400 |
| N | 3.76502800  | 0.35658100  | 0.01531100  |
| H | 4.31164200  | 0.59432800  | 0.83702400  |
| H | 4.37844400  | 0.43206300  | -0.79003600 |
| H | 3.03377000  | 1.05944400  | -0.08511700 |

Coordinates for **6a**

0 2

|   |             |             |             |
|---|-------------|-------------|-------------|
| C | -1.77714300 | -0.41986600 | -0.00817900 |
| N | -1.03748500 | 0.75748800  | -0.00100200 |
| H | -1.51148200 | 1.64665700  | -0.06254000 |
| C | 0.36829500  | 0.92736700  | -0.00539000 |
| N | 1.09378000  | -0.22629600 | 0.00685800  |
| H | 0.58066000  | -1.10485900 | -0.00827700 |
| O | -1.27785500 | -1.53372900 | -0.03594000 |
| N | -3.13507500 | -0.22191300 | -0.01812900 |
| H | -3.53534600 | 0.64186400  | 0.31089600  |
| H | -3.68394000 | -1.05505700 | 0.12273900  |
| O | 0.82601600  | 2.05294700  | -0.01563700 |
| C | 3.26519600  | -1.26688300 | 0.01677200  |
| C | 2.49261500  | -0.20446000 | 0.01327000  |
| H | 4.32185700  | -1.47088200 | 0.02149900  |
| H | 2.90064900  | 0.80663500  | 0.01537100  |

Coordinates for **7a**

0 2

|   |             |             |             |
|---|-------------|-------------|-------------|
| C | -1.43897400 | -0.49920400 | -0.01679700 |
| C | -0.51742800 | 1.75804000  | 0.01522100  |
| C | 0.74553700  | 1.33852900  | 0.13717200  |
| C | 1.08259900  | -0.12376900 | 0.10215300  |
| N | -1.57403400 | 0.88066100  | -0.14342900 |
| O | -2.39761500 | -1.24573200 | 0.00037000  |
| N | -0.13689600 | -0.91916400 | 0.10134400  |
| H | -0.03123000 | -1.89865800 | 0.32381100  |
| H | -0.78494700 | 2.80713700  | 0.03759000  |
| H | 1.56075900  | 2.03010800  | 0.29297100  |
| N | 1.88614200  | -0.44947800 | -1.10999500 |
| H | 2.72803700  | 0.11881700  | -1.15329800 |
| H | 2.14347000  | -1.43460300 | -1.11903700 |
| O | 1.95408700  | -0.53667300 | 1.05407800  |
| H | -2.52476100 | 1.21072500  | -0.17955800 |

Coordinates for **8a**

0 2

|   |             |             |             |
|---|-------------|-------------|-------------|
| C | 1.40171000  | -0.50119000 | -0.02414900 |
| C | 0.47239900  | 1.76864800  | 0.00159800  |
| C | -0.78640700 | 1.33637200  | -0.02115400 |
| C | -1.05518700 | -0.14338100 | -0.01361200 |
| N | 1.53927300  | 0.87926800  | 0.02747800  |
| O | 2.37156100  | -1.23871200 | 0.01072300  |
| N | 0.10916300  | -1.01421000 | -0.13385500 |

|   |             |             |             |
|---|-------------|-------------|-------------|
| H | -1.79477400 | -1.36954600 | -1.31395800 |
| H | 0.74154600  | 2.81696900  | -0.00633900 |
| H | -1.62523800 | 2.01603000  | -0.06940600 |
| N | -1.62090800 | -0.54122600 | 1.24936500  |
| H | -2.37245200 | 0.06140300  | 1.56085700  |
| H | -1.89464600 | -1.51667600 | 1.25781100  |
| O | -1.86280600 | -0.41825200 | -1.15582800 |
| H | 2.48774700  | 1.21801600  | 0.07485400  |

Coordinates for **9a**

0 1

|   |             |             |             |
|---|-------------|-------------|-------------|
| C | -1.18727700 | -0.53189000 | 0.00006800  |
| C | 1.12920000  | -0.25271400 | -0.00270200 |
| C | 1.04916300  | 1.18527400  | -0.00100600 |
| C | -0.20022700 | 1.71225700  | 0.00139200  |
| H | -0.39108200 | 2.77878700  | 0.00191200  |
| N | 2.35424400  | -0.84327600 | -0.03604900 |
| H | 3.18789500  | -0.31521300 | 0.15390200  |
| H | 2.37919200  | -1.84413500 | 0.07843500  |
| N | 0.08182600  | -1.04931500 | 0.00289600  |
| O | -2.21621000 | -1.17448900 | 0.00101200  |
| N | -1.27905300 | 0.89563100  | 0.00144700  |
| H | -2.21877300 | 1.26418600  | 0.00314300  |
| H | 1.92816600  | 1.81343900  | -0.01005700 |

Coordinates for **10a**

0 1

|   |             |             |             |
|---|-------------|-------------|-------------|
| C | 0.00257600  | 1.70638900  | -0.00007500 |
| C | 1.22406900  | -0.40695400 | -0.00005900 |
| C | -1.29320500 | -0.34956200 | -0.00015400 |
| C | -1.20320700 | 1.10676400  | -0.00038900 |
| H | 0.11973300  | 2.78281100  | -0.00008000 |
| N | -0.03201100 | -0.98748300 | -0.00052600 |
| H | -0.04474600 | -1.99943400 | -0.00065300 |
| N | 1.17311500  | 0.98701300  | 0.00051100  |
| H | 2.07051900  | 1.44685500  | 0.00058800  |
| O | -2.31347700 | -1.00521700 | 0.00060000  |
| O | 2.26447400  | -1.02457400 | 0.00002700  |
| H | -2.12260500 | 1.67157600  | -0.00070400 |

Coordinates for **5b**

0 2

|   |             |             |             |
|---|-------------|-------------|-------------|
| C | 1.55032400  | 0.10108500  | -0.06488100 |
| N | 0.48360100  | -0.58206600 | 0.52229300  |
| H | 0.47659200  | -0.61607900 | 1.53396500  |
| C | -0.84941100 | -0.40112200 | -0.05695000 |

|   |             |             |             |
|---|-------------|-------------|-------------|
| N | -1.70028400 | -1.43222600 | 0.56531000  |
| H | -2.66047900 | -1.32071400 | 0.25284700  |
| H | -1.35150100 | -2.34780500 | 0.28867200  |
| O | 1.46169700  | 0.70900500  | -1.10963600 |
| N | 2.71694300  | 0.02487200  | 0.67939500  |
| H | 2.86700700  | -0.80315200 | 1.23641000  |
| H | 3.52967600  | 0.34761700  | 0.17620100  |
| O | -0.90567500 | -0.74660400 | -1.36446500 |
| C | -1.41423400 | 0.93923300  | 0.22241900  |
| C | -1.87594500 | 2.02359300  | 0.44916600  |
| H | -2.27569800 | 2.99012900  | 0.63720700  |

Coordinates for **6b**

0 2

|   |             |             |             |
|---|-------------|-------------|-------------|
| C | -1.77714300 | -0.41986600 | -0.00817900 |
| N | -1.03748500 | 0.75748800  | -0.00100200 |
| H | -1.51148200 | 1.64665700  | -0.06254000 |
| C | 0.36829500  | 0.92736700  | -0.00539000 |
| N | 1.09378000  | -0.22629600 | 0.00685800  |
| H | 0.58066000  | -1.10485900 | -0.00827700 |
| O | -1.27785500 | -1.53372900 | -0.03594000 |
| N | -3.13507500 | -0.22191300 | -0.01812900 |
| H | -3.53534600 | 0.64186400  | 0.31089600  |
| H | -3.68394000 | -1.05505700 | 0.12273900  |
| O | 0.82601600  | 2.05294700  | -0.01563700 |
| C | 3.26519600  | -1.26688300 | 0.01677200  |
| C | 2.49261500  | -0.20446000 | 0.01327000  |
| H | 4.32185700  | -1.47088200 | 0.02149900  |
| H | 2.90064900  | 0.80663500  | 0.01537100  |

Coordinates for **7b**

0 1

|   |             |             |             |
|---|-------------|-------------|-------------|
| C | -1.50773700 | -0.13483700 | -0.00002600 |
| N | -0.20371700 | -0.64279400 | -0.00013200 |
| C | 0.79456800  | 0.19455900  | -0.00029500 |
| N | 0.73180100  | 1.54266400  | -0.00068100 |
| H | 1.57240100  | 2.09374300  | -0.00178800 |
| H | -0.20093000 | 1.94917800  | -0.00072200 |
| O | -1.84682400 | 1.05238600  | 0.00165200  |
| N | -2.42504300 | -1.13927100 | -0.00439500 |
| H | -2.11757900 | -2.09568500 | 0.01052700  |
| H | -3.40288500 | -0.90792700 | 0.01139300  |
| C | 2.12721600  | -0.36202500 | 0.00020000  |
| C | 3.24785200  | -0.79492600 | 0.00065000  |
| H | 4.23090600  | -1.19921900 | 0.00065900  |

Coordinates for **8b**

0 2

|   |             |             |             |
|---|-------------|-------------|-------------|
| C | -0.57472300 | 1.39469000  | -0.01942400 |
| N | 0.74569100  | 1.02598500  | 0.06170200  |
| C | 1.07776300  | -0.23813700 | 0.01436500  |
| N | 0.25608600  | -1.30585700 | -0.00701100 |
| H | 0.64198300  | -2.23498700 | -0.03920000 |
| H | -0.74760800 | -1.15574500 | -0.01305700 |
| O | -1.56276700 | 0.65474800  | -0.14363200 |
| N | -0.78071100 | 2.75211900  | 0.14433800  |
| H | -1.50179500 | 3.06219500  | -0.51419200 |
| C | 2.48493700  | -0.54895800 | -0.00314900 |
| C | 3.65168800  | -0.83381200 | -0.01872700 |
| H | 4.69012500  | -1.06215800 | -0.03163500 |
| N | -3.30285500 | -1.99126600 | 0.05361200  |
| H | -3.05004300 | -1.00959000 | -0.00102500 |
| H | -2.90919500 | -2.46649500 | -0.75107400 |
| H | -2.88678900 | -2.38076800 | 0.89237300  |

Coordinates for **9b**

0 2

|   |             |             |             |
|---|-------------|-------------|-------------|
| C | 0.83802800  | 1.10694400  | -0.00006700 |
| C | -0.21900200 | -1.01562700 | -0.00011000 |
| C | 1.05360600  | -1.65735400 | -0.00010700 |
| C | 2.18340600  | -0.93688000 | 0.00015300  |
| H | 3.17926400  | -1.36524800 | 0.00038400  |
| N | -1.36797200 | -1.71941100 | 0.00001400  |
| H | -1.35762200 | -2.72380900 | 0.00017200  |
| H | -2.24040000 | -1.20776200 | 0.00022400  |
| N | -0.28197800 | 0.30451900  | -0.00029600 |
| O | 0.82649700  | 2.31910200  | -0.00002500 |
| N | 2.08800800  | 0.42615400  | 0.00009800  |
| H | 2.90798500  | 1.01650000  | 0.00035400  |
| N | -3.57638000 | 0.85466400  | 0.00005600  |
| H | -3.85015400 | 0.34000300  | -0.82812800 |
| H | -3.84899400 | 0.34167700  | 0.82968300  |
| H | -2.57004100 | 1.00184300  | -0.00080200 |

Coordinates for **11**

0 1

|   |             |             |             |
|---|-------------|-------------|-------------|
| C | 1.56280600  | 0.07275300  | -0.06851000 |
| N | 0.19539800  | 0.44061400  | 0.00778900  |
| H | -0.03148300 | 1.41622500  | -0.12094200 |
| C | -0.88962300 | -0.43146300 | 0.08880800  |
| O | 1.95830200  | -1.03797100 | -0.30267400 |
| N | 2.38490400  | 1.17468400  | 0.09474400  |

|   |             |             |             |
|---|-------------|-------------|-------------|
| H | 2.08953000  | 1.91766800  | 0.71027900  |
| H | 3.36432900  | 0.93878000  | 0.15113300  |
| O | -0.82798600 | -1.62104800 | 0.26178500  |
| C | -2.16242800 | 0.27893400  | -0.03987500 |
| C | -3.23403600 | 0.81536500  | -0.13256800 |
| H | -4.18733200 | 1.27886700  | -0.21822500 |

Coordinates for **12**

0 2

|   |             |             |             |
|---|-------------|-------------|-------------|
| C | 1.58120100  | 0.15978800  | -0.00503200 |
| N | 0.22127200  | 0.47043800  | -0.02451400 |
| H | 0.00292600  | 1.45724700  | -0.05247700 |
| C | -0.84763100 | -0.43021800 | 0.02394800  |
| O | 2.05603000  | -0.95535400 | -0.12118700 |
| N | 2.36591300  | 1.30276600  | 0.02955300  |
| H | 3.27350200  | 1.02751000  | 0.41650700  |
| O | -0.74092900 | -1.62747700 | 0.09090000  |
| C | -2.13549600 | 0.25415300  | -0.00537400 |
| C | -3.21900600 | 0.77311900  | -0.03086200 |
| H | -4.18193600 | 1.22440800  | -0.05308100 |

Coordinates for **13**

0 2

|   |             |             |             |
|---|-------------|-------------|-------------|
| C | 0.12522800  | 1.74670800  | 0.00010800  |
| C | 1.14844900  | -0.47167700 | -0.00006100 |
| C | -1.37789000 | -0.20865000 | -0.00016000 |
| C | -1.09358800 | 1.21164100  | -0.00072100 |
| H | 0.32118900  | 2.81248100  | 0.00008700  |
| N | -0.15930200 | -0.94135200 | -0.00046300 |
| H | -0.25294600 | -1.95001000 | -0.00076800 |
| N | 1.23477500  | 0.92043300  | 0.00037500  |
| H | 2.17135800  | 1.29572800  | 0.00076800  |
| O | -2.44621500 | -0.77260000 | 0.00063200  |
| O | 2.12357700  | -1.18738700 | 0.00005900  |

Coordinates for **13-NH<sub>3</sub>**

0 2

|   |             |             |             |
|---|-------------|-------------|-------------|
| C | -0.16736800 | 1.63541500  | -0.00069200 |
| C | 0.38167500  | -0.72103900 | -0.00055400 |
| C | -2.03898600 | 0.03398000  | 0.00042200  |
| C | -1.47380200 | 1.36427400  | 0.00000100  |
| H | 0.23939700  | 2.64033400  | -0.00091300 |
| N | -0.99090700 | -0.92810000 | 0.00020800  |
| H | -1.28317200 | -1.89781500 | 0.00034900  |
| N | 0.75597800  | 0.61254200  | -0.00107200 |
| H | 1.77952400  | 0.77885100  | -0.00100900 |

|   |             |             |             |
|---|-------------|-------------|-------------|
| O | -3.19910800 | -0.30931100 | 0.00088600  |
| O | 1.18714400  | -1.63643200 | -0.00094200 |
| H | 3.30630300  | -0.67413900 | 0.00275000  |
| N | 3.59204000  | 0.30484600  | 0.00119100  |
| H | 4.17232300  | 0.46042600  | 0.81965700  |
| H | 4.17244200  | 0.45749300  | -0.81774100 |

#### Coordinates for **14**

0 2

|   |             |             |             |
|---|-------------|-------------|-------------|
| C | 0.92609100  | 0.11496300  | 0.00649600  |
| N | -0.33312300 | -0.47383200 | -0.02662400 |
| H | -0.41948800 | -1.46594900 | 0.13111200  |
| N | 1.96283100  | -0.80240400 | 0.06635400  |
| H | 2.86844900  | -0.38583500 | -0.08700600 |
| O | 1.09801600  | 1.31641300  | 0.01555900  |
| C | -1.50370600 | 0.30225500  | -0.03972300 |
| C | -2.73750400 | -0.14212700 | 0.02186600  |
| H | -3.30722000 | -1.05317500 | 0.09615500  |
| H | -1.28015100 | 1.36357600  | -0.11189100 |
| H | 1.83703700  | -1.70682100 | -0.36278900 |

#### Coordinates for **15**

0 2

|   |             |             |             |
|---|-------------|-------------|-------------|
| C | 0.15133900  | 0.16318500  | -0.05557500 |
| N | -1.19813700 | 0.49823900  | 0.03346100  |
| H | -1.47354700 | 1.46485800  | -0.04441400 |
| N | 1.00253800  | 1.23287200  | -0.09752700 |
| H | 1.99493000  | 0.99412700  | -0.00163300 |
| O | 0.52232400  | -1.00171300 | -0.11762800 |
| C | -2.20191600 | -0.48083600 | 0.04184300  |
| C | -3.49941200 | -0.27552800 | 0.04838600  |
| H | -4.22900800 | 0.51705200  | 0.04958500  |
| H | -1.78181600 | -1.48337900 | 0.04409400  |
| H | 0.69922900  | 2.12801300  | 0.25066800  |
| N | 3.48922200  | -0.31310400 | 0.09094900  |
| H | 2.73101800  | -0.99145700 | 0.00998400  |
| H | 4.01140000  | -0.53050200 | 0.93379900  |
| H | 4.11377500  | -0.45198700 | -0.69715100 |

#### Coordinates for **16**

0 2

|   |             |            |             |
|---|-------------|------------|-------------|
| C | -0.29530600 | 0.18034500 | -0.05942600 |
| N | 1.05420900  | 0.50553000 | 0.02044200  |
| H | 1.32897500  | 1.47395600 | -0.04370000 |
| N | -1.13640700 | 1.26224600 | -0.09225800 |
| H | -2.12575500 | 1.04588700 | 0.00316500  |



|   |             |             |             |
|---|-------------|-------------|-------------|
| O | -0.67973300 | -0.97915700 | -0.12603500 |
| C | 2.05695500  | -0.45991400 | 0.03865000  |
| C | 3.36600300  | -0.20438500 | 0.05288500  |
| H | 3.76350600  | 0.80517600  | 0.04663800  |
| H | 4.07633000  | -1.01863700 | 0.07058400  |
| H | 1.65736200  | -1.46595800 | 0.04210300  |
| H | -0.82724700 | 2.14914900  | 0.27163700  |
| N | -3.61221700 | -0.37692100 | 0.11051200  |
| H | -2.85563700 | -1.07144000 | 0.01379600  |
| H | -4.48466700 | -0.91713200 | 0.14053000  |

#### Coordinates for 17

0 2

|   |             |             |             |
|---|-------------|-------------|-------------|
| C | 0.99212500  | 0.00449700  | -0.00000700 |
| N | -0.10281600 | -0.83974400 | -0.00000200 |
| H | 0.18355100  | -1.80810700 | 0.00000000  |
| N | 0.69326700  | 1.36676800  | 0.00000000  |
| H | 1.61079400  | 1.82563800  | 0.00001000  |
| O | 2.13410900  | -0.44704900 | 0.00000400  |
| C | -1.48887300 | -0.61915300 | 0.00000100  |
| C | -2.17408900 | 0.52550800  | 0.00000100  |
| H | -1.69732200 | 1.49327200  | -0.00000200 |
| H | -3.25477400 | 0.47461600  | 0.00000300  |
| H | -2.02326200 | -1.56329900 | 0.00000500  |

#### Coordinates for 18

0 2

|   |             |             |             |
|---|-------------|-------------|-------------|
| C | 0.84830300  | -0.02806000 | 0.00266100  |
| N | 0.04670100  | 1.11875700  | -0.03927000 |
| H | 0.46406200  | 2.02603200  | 0.08763700  |
| N | -0.03703500 | -1.08119700 | 0.08529000  |
| H | 0.28905900  | -2.01376600 | -0.10311500 |
| O | 2.05852600  | -0.06384600 | -0.02264000 |
| C | -1.30512000 | 0.82602000  | 0.10629200  |
| C | -1.42954800 | -0.66823600 | -0.04567700 |
| H | -1.85125200 | -0.95842300 | -1.02445600 |
| H | -2.05650800 | 1.53612000  | -0.20826300 |
| H | -2.06303600 | -1.12046300 | 0.72751400  |

#### Coordinates for 19

0 2

|   |            |             |             |
|---|------------|-------------|-------------|
| C | 1.93209400 | -0.26470000 | 0.01979200  |
| N | 0.86044400 | -0.61079000 | 0.82609800  |
| H | 0.69738900 | -1.57348500 | 1.07364400  |
| N | 1.64303400 | 0.99695700  | -0.48475600 |
| H | 2.42066300 | 1.55941300  | -0.79090500 |

|   |             |             |             |
|---|-------------|-------------|-------------|
| O | 2.91640900  | -0.93188000 | -0.21387000 |
| C | -0.22094000 | 0.35380800  | 0.79068100  |
| C | 0.48399900  | 1.59067300  | 0.16858500  |
| H | 0.76864100  | 2.29902000  | 0.95503200  |
| C | -1.46529500 | -0.16680000 | 0.02108500  |
| O | -1.84365700 | -1.39784100 | 0.45028400  |
| N | -2.54203500 | 0.79449500  | 0.11710000  |
| H | -3.42330700 | 0.32309800  | -0.05762300 |
| H | -2.43198100 | 1.54972500  | -0.55114500 |
| H | -0.59216900 | 0.57975200  | 1.79212100  |
| H | -0.15359500 | 2.11210700  | -0.54853800 |
| N | -1.11241400 | -0.50041000 | -1.38384200 |
| H | -0.29239800 | -1.09943100 | -1.44098300 |
| H | -1.89760600 | -0.95206800 | -1.84596900 |

Coordinates for **20**

0 2

|   |             |             |             |
|---|-------------|-------------|-------------|
| C | 1.41027000  | 0.73403200  | -0.06697500 |
| N | 0.66051000  | 0.07155200  | 0.90014800  |
| H | 0.93234400  | -0.89966900 | 1.07303800  |
| N | 0.58930100  | 1.71504700  | -0.60852500 |
| H | 1.03207300  | 2.51225800  | -1.03661200 |
| O | 2.55883700  | 0.50308600  | -0.38094200 |
| C | -0.73683500 | 0.41557500  | 0.77707600  |
| C | -0.64958300 | 1.83198100  | 0.13994800  |
| H | -0.59750100 | 2.59439400  | 0.92833400  |
| C | -1.51410300 | -0.57839500 | -0.12178800 |
| O | -0.96741900 | -1.43051300 | -0.79207400 |
| N | -2.86764900 | -0.40314300 | -0.10724100 |
| H | -3.43717900 | -1.03907100 | -0.64314600 |
| H | -3.32229300 | 0.22466500  | 0.53414700  |
| H | -1.22892200 | 0.46140600  | 1.75391300  |
| H | -1.50239400 | 2.04961600  | -0.50638100 |
| N | 1.71706200  | -2.51229700 | 0.31837100  |
| H | 1.12529800  | -2.90323400 | -0.42451100 |
| H | 2.51416500  | -2.09821100 | -0.18349800 |

Coordinates for **21**

0 2

|   |             |             |             |
|---|-------------|-------------|-------------|
| C | 1.73855500  | -0.28308800 | -0.11352000 |
| N | 0.64676300  | -0.81202500 | 0.54492200  |
| H | 0.39601800  | -1.77842600 | 0.39684100  |
| N | 1.51106900  | 1.10242500  | -0.14382900 |
| H | 2.19593300  | 1.72501600  | -0.53941000 |
| O | 2.70371800  | -0.85608100 | -0.56089800 |
| C | -0.41016800 | 0.16985800  | 0.74804200  |

|   |             |             |             |
|---|-------------|-------------|-------------|
| C | 0.25464600  | 1.45462900  | 0.31931800  |
| H | 0.10064800  | 2.40880900  | 0.80644000  |
| C | -1.68614200 | -0.26763700 | -0.02735100 |
| O | -2.00712300 | -1.43931400 | -0.05620100 |
| N | -2.40685000 | 0.74151400  | -0.57762800 |
| H | -3.21608900 | 0.49697800  | -1.12812800 |
| H | -1.96834300 | 1.63791200  | -0.72509900 |
| H | -0.71914400 | 0.20689100  | 1.80296100  |

Coordinates for **22**

0 1

|   |             |             |             |
|---|-------------|-------------|-------------|
| C | 1.88686700  | -0.24572100 | 0.02257400  |
| N | 0.62370300  | -0.80892100 | 0.05895800  |
| H | 0.43777300  | -1.79913600 | 0.07775800  |
| N | 1.60678700  | 1.12938900  | -0.05085000 |
| H | 2.34071500  | 1.81541700  | -0.10693200 |
| O | 2.97454500  | -0.77893500 | 0.04885800  |
| C | -0.37499200 | 0.15892400  | 0.00046800  |
| C | 0.24590100  | 1.36590900  | -0.07222900 |
| H | -0.16469300 | 2.35707200  | -0.16297100 |
| C | -1.78503300 | -0.26677700 | -0.01252800 |
| O | -2.07356500 | -1.44925600 | -0.11069900 |
| N | -2.72772400 | 0.72734700  | 0.05631900  |
| H | -3.68192500 | 0.41760900  | 0.15935700  |
| H | -2.49553200 | 1.62584700  | 0.44681600  |

Coordinates for **23**

0 2

|   |             |             |             |
|---|-------------|-------------|-------------|
| C | 1.84053300  | -0.25858000 | -0.00006700 |
| N | 0.57620500  | -0.83083900 | -0.00017500 |
| H | 0.39435000  | -1.82345400 | -0.00034400 |
| N | 1.55428300  | 1.12484800  | 0.00020800  |
| H | 2.28775000  | 1.81585400  | 0.00029000  |
| O | 2.92803700  | -0.78292500 | -0.00028500 |
| C | -0.41348900 | 0.12716400  | 0.00007100  |
| C | 0.20738400  | 1.35336300  | 0.00036500  |
| H | -0.24422100 | 2.32958200  | 0.00061700  |
| C | -1.83569400 | -0.21451600 | 0.00009000  |
| O | -2.20457700 | -1.39104900 | 0.00050300  |
| N | -2.61974600 | 0.91154100  | -0.00058500 |
| H | -3.59316000 | 0.58637900  | -0.00120000 |

Coordinates for **24**

0 2

|   |             |            |             |
|---|-------------|------------|-------------|
| C | -1.62630800 | 1.35727300 | 0.10697300  |
| C | 2.72360200  | 0.17437200 | -0.09681000 |

|   |             |             |             |
|---|-------------|-------------|-------------|
| C | 0.27915500  | -0.42232100 | 0.12760800  |
| C | -1.09218300 | 0.10707600  | 0.06123600  |
| N | 1.29385900  | 0.50362500  | 0.16870700  |
| N | 3.56614000  | 1.28851800  | 0.26210900  |
| H | 3.75138900  | 1.87351300  | -0.54259300 |
| O | 0.45381200  | -1.63593400 | 0.17654500  |
| N | -2.15649100 | -0.78468600 | -0.03556900 |
| N | -2.99738900 | 1.22131800  | 0.03017800  |
| C | -3.37495600 | -0.13009400 | -0.05877600 |
| O | -4.49632600 | -0.58072200 | -0.13656300 |
| H | -3.67960500 | 1.96092300  | 0.04496300  |
| H | -1.15072600 | 2.31809700  | 0.20732800  |
| H | 1.05601400  | 1.44066700  | -0.12289800 |
| H | -2.04177200 | -1.78511600 | -0.07281400 |
| H | 3.21212100  | 1.82449800  | 1.04471100  |
| N | 3.08788900  | -0.99123800 | 0.69994100  |
| H | 2.45863800  | -1.77478400 | 0.52753400  |
| H | 4.07411400  | -1.19843100 | 0.59090100  |
| O | 2.95575200  | -0.26334100 | -1.33949300 |

Coordinates for **25**

0 2

|   |             |             |             |
|---|-------------|-------------|-------------|
| C | 1.35969000  | -1.20094100 | -0.02361200 |
| C | -2.01634700 | -1.31836100 | 0.00119200  |
| C | -0.44714800 | 0.71194000  | -0.01869200 |
| C | 0.86178600  | 0.07111800  | -0.00872200 |
| N | -1.66229700 | 0.03102200  | -0.03513500 |
| N | -3.37749300 | -1.48559400 | -0.01864400 |
| H | -4.01033400 | -0.72050300 | 0.15213800  |
| O | -0.49492600 | 1.94420800  | -0.01585700 |
| O | -1.24246900 | -2.25640300 | 0.02173700  |
| N | 1.97079400  | 0.93024200  | 0.01270900  |
| N | 2.72764500  | -1.10427700 | -0.01143700 |
| C | 3.15936300  | 0.23609400  | 0.01087700  |
| O | 4.30173100  | 0.64244300  | 0.02480900  |
| H | 3.37954100  | -1.87130600 | -0.01718500 |
| H | 0.82062700  | -2.12926700 | -0.03959500 |
| H | -2.43665700 | 0.69637600  | -0.05592500 |
| H | 1.89074500  | 1.93387300  | 0.01950900  |
| H | -3.70956900 | -2.42294000 | 0.13355900  |
| N | -3.52472200 | 2.33851400  | 0.02137900  |
| H | -2.63192400 | 2.85096600  | 0.05978300  |
| H | -4.25866800 | 3.05237500  | -0.04615300 |

Coordinates for **26**

0 2

|   |             |             |             |
|---|-------------|-------------|-------------|
| C | 0.70065900  | -1.14249100 | -0.16884900 |
| C | -2.59386300 | -0.47762000 | 0.04357100  |
| C | -0.60527200 | 1.14649800  | -0.06094800 |
| C | 0.51254900  | 0.21008000  | -0.03957700 |
| N | -1.94693000 | 0.73878700  | -0.11816100 |
| N | -3.96565400 | -0.29330000 | 0.08052900  |
| H | -4.36116700 | -1.15351300 | 0.47169200  |
| O | -0.38306500 | 2.34852900  | -0.03519900 |
| O | -2.04961700 | -1.57530100 | 0.07741200  |
| N | 1.78210800  | 0.77607800  | 0.08988700  |
| N | 2.04629400  | -1.37341100 | -0.10784900 |
| C | 2.77754300  | -0.17788300 | 0.05322000  |
| O | 3.97812000  | -0.05540500 | 0.13536600  |
| H | 2.50141100  | -2.26971400 | -0.17211400 |
| H | -0.03492800 | -1.91408700 | -0.29255100 |
| H | -2.56786400 | 1.53762400  | -0.17457000 |
| H | 1.93862300  | 1.76853300  | 0.17156400  |

Coordinates for **27**

0 2

|   |             |             |             |
|---|-------------|-------------|-------------|
| C | -0.26877100 | -0.86498100 | 0.60181600  |
| C | 2.09758000  | -0.71248200 | -0.13267300 |
| C | 0.81391100  | 1.42256200  | 0.09462100  |
| C | -0.33867800 | 0.61079200  | 0.33947000  |
| N | 1.99922400  | 0.66631300  | 0.09754700  |
| N | 0.89513500  | -1.40186700 | -0.09079600 |
| H | 1.03218100  | -2.40295400 | -0.07751700 |
| O | 0.79837800  | 2.62897200  | -0.10311700 |
| O | 3.15798600  | -1.24798000 | -0.36661200 |
| N | -1.62936900 | 0.92908900  | 0.04294700  |
| N | -1.55778400 | -1.29427000 | 0.08321600  |
| C | -2.41955500 | -0.22777200 | -0.13774000 |
| O | -3.58693200 | -0.25757600 | -0.42238600 |
| H | -1.96790100 | -2.18151600 | 0.33035800  |
| H | -0.20548800 | -1.08852600 | 1.68106000  |
| H | 2.85751500  | 1.17871400  | -0.05700400 |
| H | -1.92912100 | 1.84338600  | -0.26334200 |

Coordinates for Uric acid (**28**)

0 1

|   |             |             |             |
|---|-------------|-------------|-------------|
| C | -0.25935900 | -0.76622700 | 0.00062000  |
| C | 2.15068000  | -0.72646300 | -0.00002900 |
| C | 0.80660500  | 1.43368600  | -0.00031800 |
| C | -0.35270400 | 0.59384900  | 0.00130600  |
| N | 1.99529900  | 0.65137900  | -0.00098000 |
| N | 0.93685900  | -1.42892300 | -0.00072700 |

|   |             |             |             |
|---|-------------|-------------|-------------|
| H | 1.01183100  | -2.43465300 | 0.00012100  |
| O | 0.84808300  | 2.64813700  | -0.00016600 |
| O | 3.21963000  | -1.29273900 | 0.00072800  |
| N | -1.71527500 | 0.90981600  | -0.00034100 |
| N | -1.52512400 | -1.28539700 | -0.00036800 |
| C | -2.48732700 | -0.23299300 | 0.00001100  |
| O | -3.68741100 | -0.36370400 | -0.00031000 |
| H | -1.80329300 | -2.25337000 | 0.00056100  |
| H | 2.86058900  | 1.17586400  | 0.00003300  |
| H | -2.10121800 | 1.83937500  | 0.00464200  |

Coordinates for **29**

0 2

|   |             |             |             |
|---|-------------|-------------|-------------|
| C | -1.61304200 | 1.33939100  | 0.13696100  |
| C | 2.70122000  | 0.17199100  | -0.09041100 |
| C | 0.27607400  | -0.46636200 | 0.13158500  |
| C | -1.09207000 | 0.08544400  | 0.06276900  |
| N | 1.28870300  | 0.48948100  | 0.12440800  |
| N | 3.51462900  | 1.35155500  | -0.06375500 |
| H | 3.51283300  | 0.06588000  | -1.80701800 |
| O | 0.44606800  | -1.66499200 | 0.22106500  |
| N | -2.16498500 | -0.79241000 | -0.05834400 |
| N | -2.98674800 | 1.21937100  | 0.05120400  |
| C | -3.37706600 | -0.12518800 | -0.06734900 |
| O | -4.50297900 | -0.56375700 | -0.15556800 |
| H | -3.66212100 | 1.96440100  | 0.08652900  |
| H | -1.12690100 | 2.29072100  | 0.27064500  |
| H | 1.03065500  | 1.35995700  | -0.32096600 |
| H | -2.06057700 | -1.79377200 | -0.10394800 |
| H | 3.15207700  | 1.96019800  | 0.67713900  |
| N | 3.17261500  | -0.67412900 | 0.98739500  |
| H | 4.14504900  | -0.92354800 | 0.85416300  |
| H | 2.99578600  | -0.29247700 | 1.90886900  |
| O | 2.91603600  | -0.49876100 | -1.30213400 |

Coordinates for **30-OH**

0 2

|   |             |             |             |
|---|-------------|-------------|-------------|
| C | 1.74825300  | -1.40777000 | 0.19501700  |
| C | -2.65360200 | -1.10045100 | -0.03094300 |
| C | -0.38515500 | 0.05817700  | -0.02185800 |
| C | 1.04729800  | -0.25594500 | 0.00217700  |
| N | -1.22763700 | -1.02195700 | -0.10437200 |
| N | -3.28667600 | -2.18714800 | -0.25804300 |
| O | -0.74820500 | 1.23194500  | 0.01974200  |
| N | 1.98066000  | 0.76787200  | -0.13659500 |
| N | 3.08566900  | -1.08546900 | 0.16261600  |

|   |             |             |             |
|---|-------------|-------------|-------------|
| C | 3.27820900  | 0.29495700  | -0.03673100 |
| O | 4.32708500  | 0.89252000  | -0.10241900 |
| H | 3.86089700  | -1.71439400 | 0.29299800  |
| H | 1.40499500  | -2.41157300 | 0.38109300  |
| H | -0.79311100 | -1.90865700 | -0.30858800 |
| H | 1.74049900  | 1.73955000  | -0.24995300 |
| H | -2.66851200 | -2.96458000 | -0.47329200 |
| N | -3.29531900 | 0.03278900  | 0.36594700  |
| H | -4.29868600 | -0.03039000 | 0.29535700  |
| H | -2.88812800 | 0.94390800  | 0.21567500  |
| O | -2.76332800 | 3.19099000  | -0.03927700 |
| H | -1.88926800 | 2.74607000  | -0.03049700 |

### Coordinates for **30**

0 1

|   |             |             |             |
|---|-------------|-------------|-------------|
| C | -1.29532800 | 1.33348900  | 0.17821600  |
| C | 3.01651300  | 0.28007400  | -0.02494400 |
| C | 0.59329400  | -0.44952600 | -0.01384200 |
| C | -0.77327500 | 0.08792100  | 0.00805800  |
| N | 1.60490700  | 0.48599500  | -0.04469000 |
| N | 3.86037700  | 1.21742400  | -0.22922300 |
| O | 0.76996400  | -1.66273700 | -0.00948400 |
| N | -1.84736800 | -0.78757900 | -0.12379300 |
| N | -2.66742700 | 1.21180300  | 0.14235700  |
| C | -3.06062900 | -0.12689200 | -0.04009700 |
| O | -4.18702900 | -0.56363400 | -0.10573000 |
| H | -3.34168200 | 1.95083800  | 0.25344100  |
| H | -0.80933100 | 2.28008900  | 0.34471400  |
| H | 1.33556100  | 1.44571800  | -0.19458800 |
| H | -1.74657900 | -1.78502800 | -0.22550000 |
| H | 3.41286200  | 2.11445100  | -0.39691100 |
| N | 3.40434300  | -0.98992500 | 0.28337100  |
| H | 4.38387200  | -1.17296100 | 0.13972700  |
| H | 2.73454600  | -1.73656200 | 0.16031900  |

### Coordinates for **31**

0 2

|   |             |             |             |
|---|-------------|-------------|-------------|
| C | -0.68360500 | -1.11188200 | -0.26813600 |
| C | 2.52524600  | -0.29917600 | 0.10554000  |
| C | 0.62877100  | 1.12401800  | -0.10233700 |
| C | -0.53874400 | 0.23727200  | -0.10517600 |
| N | 1.81977600  | 0.59944300  | -0.60323500 |
| N | 2.10647300  | -0.69713300 | 1.29798000  |
| H | 2.75515600  | -1.37883600 | 1.69949800  |
| O | 0.51196700  | 2.30258000  | 0.17816700  |
| N | -1.81360000 | 0.76600200  | 0.03974800  |

|   |             |             |             |
|---|-------------|-------------|-------------|
| N | -2.02584900 | -1.38957100 | -0.20445100 |
| C | -2.78445700 | -0.21933700 | -0.00235900 |
| O | -3.98598300 | -0.13082400 | 0.10695900  |
| H | -2.46095300 | -2.29457900 | -0.27764400 |
| H | 0.06577300  | -1.86799700 | -0.41481300 |
| N | 3.70627100  | -0.70207000 | -0.48192600 |
| H | 3.84262900  | -0.44756300 | -1.44687700 |
| H | 4.15001400  | -1.54776000 | -0.16645700 |
| H | -1.99525800 | 1.74061000  | 0.22328400  |

### Coordinates for **32**

0 2

|   |             |             |             |
|---|-------------|-------------|-------------|
| C | 0.26640400  | -0.87633700 | 0.60543300  |
| C | -2.03318100 | -0.48214500 | -0.09686600 |
| C | -0.76140100 | 1.45322200  | 0.09443700  |
| C | 0.36975200  | 0.60197400  | 0.37933300  |
| N | -2.00118500 | 0.81037500  | 0.03204700  |
| N | -0.94579100 | -1.33292700 | -0.06069100 |
| H | -1.11131400 | -2.32639700 | -0.11932100 |
| O | -0.61700600 | 2.65555200  | -0.10273600 |
| N | 1.67869200  | 0.88086500  | 0.09256300  |
| N | 1.51964400  | -1.34096800 | 0.03282800  |
| C | 2.41929300  | -0.28653400 | -0.14801900 |
| O | 3.58351900  | -0.35971600 | -0.44529700 |
| H | 1.91989600  | -2.22958600 | 0.29338700  |
| H | 0.22277100  | -1.13759500 | 1.67866900  |
| N | -3.23550700 | -1.08456200 | -0.37099000 |
| H | -4.01612100 | -0.44642000 | -0.33221700 |
| H | -3.41229900 | -2.01201200 | -0.01740100 |
| H | 1.98878100  | 1.79476700  | -0.20506200 |

### Coordinates for **33**

0 2

|   |             |             |             |
|---|-------------|-------------|-------------|
| C | 0.16456400  | -0.96461500 | 0.52360300  |
| C | -2.07321300 | -0.33062100 | -0.10719000 |
| C | -0.53513500 | 1.39571700  | -0.01845300 |
| C | 0.38109500  | 0.48569500  | 0.85702300  |
| N | -1.81071000 | 0.93809900  | -0.25142800 |
| N | -1.13776800 | -1.31630200 | 0.11713500  |
| H | -1.47349900 | -2.24497300 | 0.32861300  |
| O | -0.10675700 | 2.45696200  | -0.41640000 |
| N | 1.79413900  | 0.66288700  | 0.57763200  |
| N | 1.29578700  | -1.36679700 | -0.18758600 |
| C | 2.31458600  | -0.39650600 | -0.14416600 |
| O | 3.41035600  | -0.50513300 | -0.63820900 |
| H | 1.50450400  | -2.30457600 | -0.49064400 |



|   |             |             |             |
|---|-------------|-------------|-------------|
| H | 0.14471300  | 0.70633800  | 1.90670300  |
| N | -3.37788300 | -0.74545300 | -0.16206000 |
| H | -4.00746200 | -0.03047400 | -0.49507200 |
| H | -3.57667200 | -1.67848500 | -0.49060400 |
| H | 2.12328700  | 1.59247800  | 0.35713200  |

Coordinates for **34**

0 1

|   |             |             |             |
|---|-------------|-------------|-------------|
| C | 0.16165200  | -0.86569800 | 0.15566900  |
| C | -2.03442300 | -0.49807000 | -0.04273900 |
| C | -0.74778800 | 1.42609000  | -0.05133000 |
| C | 0.33036600  | 0.55045900  | 0.62406000  |
| N | -1.97547700 | 0.81451600  | -0.11939700 |
| N | -0.97526200 | -1.41950200 | -0.07727000 |
| O | -0.49781100 | 2.56198400  | -0.38541300 |
| N | 1.72639500  | 0.79647400  | 0.36146000  |
| N | 1.40096500  | -1.36669700 | -0.05020800 |
| C | 2.39274000  | -0.32643600 | -0.04642000 |
| O | 3.54426700  | -0.47591700 | -0.35543000 |
| H | 1.59123000  | -2.26419600 | -0.47199100 |
| H | 0.10496300  | 0.59005800  | 1.70074700  |
| N | -3.24174200 | -1.08851300 | -0.00839500 |
| H | -4.06244600 | -0.51273000 | -0.09877100 |
| H | -3.30116000 | -2.08863600 | -0.09750800 |
| H | 2.13633700  | 1.71494900  | 0.31549100  |

Coordinates for **34-NH<sub>2</sub>**

0 2

|   |             |             |             |
|---|-------------|-------------|-------------|
| C | -0.76721000 | 0.90253500  | 0.15916300  |
| C | 1.46927100  | 0.84646600  | 0.03145900  |
| C | 0.45225200  | -1.24666700 | 0.03031700  |
| C | -0.75809700 | -0.51636200 | 0.64810700  |
| N | 1.58086500  | -0.47429900 | -0.02849500 |
| N | 0.28893700  | 1.60449200  | -0.04709500 |
| O | 0.37715800  | -2.41963000 | -0.26747200 |
| N | -2.09670800 | -0.95590000 | 0.34103700  |
| N | -2.05678700 | 1.22660000  | -0.09373700 |
| C | -2.89553000 | 0.06036600  | -0.10709300 |
| O | -4.04508300 | 0.04568400  | -0.45741600 |
| H | -2.35223300 | 2.08322600  | -0.53922900 |
| H | -0.57227700 | -0.50943100 | 1.73296900  |
| N | 2.57855000  | 1.58826800  | 0.08050100  |
| H | 3.49054500  | 1.13157800  | 0.03612100  |
| H | 2.48458700  | 2.58785000  | 0.01283700  |
| H | -2.37485200 | -1.92253100 | 0.29789700  |
| N | 4.62797800  | -0.48444600 | -0.21178500 |

|   |            |             |             |
|---|------------|-------------|-------------|
| H | 3.77949700 | -1.06847300 | -0.27128000 |
| H | 5.42416400 | -1.12167800 | -0.32490300 |

Coordinates for **35**

0 2

|   |             |             |             |
|---|-------------|-------------|-------------|
| C | 0.49448100  | -1.10980500 | 0.00014100  |
| C | 2.42340500  | 0.01153500  | 0.00002400  |
| C | 0.53335100  | 1.38136200  | -0.00011100 |
| C | -0.21634500 | 0.12389700  | 0.00066700  |
| N | 1.89603500  | 1.22197800  | -0.00030200 |
| N | 1.79117300  | -1.22852500 | -0.00017500 |
| O | -0.02970900 | 2.47969500  | -0.00050600 |
| N | -1.54062300 | -0.14927200 | 0.00058800  |
| N | -0.46097200 | -2.09784800 | -0.00002700 |
| C | -1.75120800 | -1.53926200 | -0.00000500 |
| O | -2.80332900 | -2.12665200 | -0.00042200 |
| H | -0.29285100 | -3.09140400 | -0.00084900 |
| H | -3.54232300 | 2.50053000  | -0.81958000 |
| N | 3.77127800  | -0.08608500 | 0.00246200  |
| H | 4.31891100  | 0.75723700  | -0.00648700 |
| H | 4.20405300  | -0.99292500 | -0.00785900 |
| H | -2.29377900 | 0.58962200  | 0.00110600  |
| N | -3.02414600 | 2.20069500  | 0.00016900  |
| H | -2.11795700 | 2.67576000  | -0.00039400 |
| H | -3.54307500 | 2.50388900  | 0.81817700  |

Coordinates for **36-NH<sub>2</sub>**

0 2

|   |             |             |             |
|---|-------------|-------------|-------------|
| C | -0.35753400 | -1.07553600 | 0.00122800  |
| C | -2.40140800 | -0.18510400 | 0.00261200  |
| C | -0.44245400 | 1.35104100  | -0.00341900 |
| C | 0.29895900  | 0.14385300  | -0.00704600 |
| N | -1.84285800 | 1.06205100  | 0.00340400  |
| N | -1.69184600 | -1.28716200 | -0.00665500 |
| O | -0.07357500 | 2.52304500  | 0.00108200  |
| N | 1.66850000  | -0.10977900 | -0.00888800 |
| N | 0.60762400  | -2.04570400 | 0.00360700  |
| C | 1.90415200  | -1.47102800 | -0.00144400 |
| O | 2.95471900  | -2.07193700 | 0.00017700  |
| H | 0.45087000  | -3.04034500 | 0.01012400  |
| H | -2.42697200 | 1.88514300  | 0.07236300  |
| H | 2.39630300  | 0.61008400  | -0.00856500 |
| N | -3.77263200 | -0.26175600 | 0.06789000  |
| H | -4.30602600 | 0.46530100  | -0.38476200 |
| H | -4.12324900 | -1.19503100 | -0.08985100 |
| N | 2.93413000  | 2.48639400  | 0.00108300  |

|   |            |            |            |
|---|------------|------------|------------|
| H | 2.00491600 | 2.93356700 | 0.00771000 |
| H | 3.62430300 | 3.24474800 | 0.00822600 |

### Coordinates for **36**

0 1

|   |             |             |             |
|---|-------------|-------------|-------------|
| C | -0.24422100 | -0.76311800 | 0.00042800  |
| C | 1.98398800  | -0.69156400 | -0.00211600 |
| C | 0.73222100  | 1.46700100  | 0.00257000  |
| C | -0.39690400 | 0.60780500  | 0.00786400  |
| N | 1.92956900  | 0.67427300  | -0.00268700 |
| N | 0.91669200  | -1.45451200 | 0.00795400  |
| O | 0.79833200  | 2.68438700  | -0.00383900 |
| N | -1.76505800 | 0.87685300  | 0.00752400  |
| N | -1.50498100 | -1.30840400 | -0.00277200 |
| C | -2.49472500 | -0.30175300 | 0.00045800  |
| O | -3.69454400 | -0.45650300 | -0.00188500 |
| H | -1.72720100 | -2.29057100 | -0.00903900 |
| H | 2.77865300  | 1.22012900  | -0.07163600 |
| H | -2.19191500 | 1.78805400  | 0.00797500  |
| N | 3.22647500  | -1.27282200 | -0.06650600 |
| H | 3.99909700  | -0.78949900 | 0.36567200  |
| H | 3.21003700  | -2.26912900 | 0.09301100  |

### Coordinates for optimized transition states (TS)

#### Coordinates for TS **1** → **2**

0 2

|   |             |             |             |
|---|-------------|-------------|-------------|
| N | -0.06551400 | -0.05173400 | 0.09400500  |
| H | -0.04798200 | -0.81743300 | 0.75098000  |
| C | 1.13580100  | 0.34653000  | -0.47655800 |
| N | 2.26131500  | 0.04588900  | 0.29223100  |
| H | 2.09824700  | 0.18874800  | 1.28775300  |
| O | 1.18301700  | 0.89282800  | -1.56544700 |
| H | -0.83534300 | -0.06996800 | -0.55893100 |
| H | 3.34967400  | 0.66815800  | -0.13032600 |
| N | 3.90013100  | 1.63166300  | -0.52998100 |
| H | 3.31636500  | 1.91948000  | -1.32019400 |
| H | 3.84439600  | 2.38157600  | 0.16120700  |

#### Coordinates for TS **2** → **3**

0 2

|   |             |             |            |
|---|-------------|-------------|------------|
| C | -0.06153000 | -0.48592700 | 0.00753700 |
| N | 0.30136500  | 0.65281100  | 0.77171900 |
| H | 1.19126900  | 1.01022900  | 0.44785500 |
| H | -0.40656600 | 1.37400100  | 0.72581500 |

|   |             |             |             |
|---|-------------|-------------|-------------|
| N | -1.45574700 | -0.57406800 | -0.18118000 |
| H | -1.70539300 | -1.43531600 | -0.65131400 |
| H | -1.96217400 | -0.50449300 | 0.69419900  |
| O | 0.72189100  | -0.87184500 | -0.94893200 |
| N | 0.45291300  | -1.82498800 | 1.04950700  |
| H | 1.23507000  | -1.57456000 | 1.64948400  |
| C | 0.43151700  | -3.19696700 | 0.74920200  |
| N | -0.06219300 | -3.51659100 | -0.48871000 |
| H | 0.15614300  | -2.85538100 | -1.22540100 |
| H | -0.00928100 | -4.49842500 | -0.71384300 |
| O | 0.73635100  | -4.00298900 | 1.61083600  |

Coordinates for TS 3 → 4

0 2

|   |             |             |             |
|---|-------------|-------------|-------------|
| C | 1.11465900  | -0.18396800 | -0.13337900 |
| N | 2.03153700  | -1.27214300 | -0.15585200 |
| H | 2.91855900  | -0.94315200 | -0.51749700 |
| H | 1.69420700  | -2.03127600 | -0.73642600 |
| N | -0.22050300 | -0.69636800 | -0.10021300 |
| H | -0.29075800 | -1.62228700 | 0.30046800  |
| C | -1.34096100 | 0.11243200  | 0.15385400  |
| N | -2.51838200 | -0.60754700 | 0.05817800  |
| H | -3.34833200 | -0.03763400 | 0.12104100  |
| H | -2.56035400 | -1.35932900 | -0.61304300 |
| O | 1.38344200  | 0.91647700  | -0.66727400 |
| O | -1.30422800 | 1.28216100  | 0.46580200  |
| N | 1.33110500  | 0.57370100  | 1.57900600  |
| H | 2.26072600  | 1.00026600  | 1.61028900  |
| H | 0.65394900  | 1.34361200  | 1.58807900  |

Coordinates for TS 4 → 5a

0 2

|   |             |             |             |
|---|-------------|-------------|-------------|
| C | 1.15587000  | -0.22775700 | 0.33519400  |
| N | -0.06585000 | -0.86014000 | -0.02845500 |
| H | 0.07129000  | -1.83567200 | -0.25257900 |
| C | -1.35916100 | -0.36477300 | 0.09080500  |
| N | -2.32606700 | -1.24387600 | -0.33831000 |
| H | -3.25243900 | -0.85010500 | -0.38991800 |
| H | -2.10229800 | -1.94191800 | -1.02996500 |
| O | 2.16653900  | -0.91078700 | 0.34346100  |
| N | 1.09724900  | 1.11371700  | 0.56970100  |
| H | 2.18233000  | 1.60564300  | 1.19348200  |
| H | 0.17864000  | 1.42429500  | 0.89341000  |
| O | -1.63066500 | 0.72523200  | 0.56723200  |
| N | 2.97605900  | 1.53431700  | 2.04111800  |
| H | 2.52609200  | 1.57906100  | 2.95606700  |

|   |            |            |            |
|---|------------|------------|------------|
| H | 3.37179800 | 0.59666200 | 1.94334400 |
|---|------------|------------|------------|

Coordinates for TS **5a** → **6a**

0 2

|   |             |             |             |
|---|-------------|-------------|-------------|
| C | 0.96577400  | 0.14502400  | 0.19273900  |
| N | -0.17575600 | -0.65909200 | 0.14661500  |
| H | -0.08898600 | -1.61368600 | -0.17387400 |
| C | -1.53267100 | -0.28094000 | 0.30353000  |
| N | -1.77833600 | 0.94512500  | 0.87931900  |
| H | -1.02239600 | 1.60458800  | 0.67122500  |
| O | 0.91517600  | 1.35728300  | 0.39001500  |
| N | 2.12920400  | -0.51857500 | -0.02929100 |
| H | 2.17022700  | -1.52281600 | 0.02031700  |
| H | 2.98860200  | 0.02757900  | 0.10392100  |
| O | -2.39520500 | -1.08845300 | 0.00618600  |
| C | -3.18662600 | 2.71757800  | -0.79256100 |
| C | -3.50492700 | 1.71315300  | -0.18414500 |
| H | -2.78674200 | 3.58456500  | -1.26130600 |
| H | -4.06276800 | 0.87905000  | 0.17422300  |
| N | 3.98972700  | 1.66757000  | 0.47414700  |
| H | 3.07292600  | 2.10682100  | 0.55172800  |
| H | 4.50298200  | 2.14869400  | -0.25764600 |
| H | 4.48385000  | 1.82577700  | 1.34663100  |

Coordinates for TS **6a** → **7a**

0 2

|   |             |             |             |
|---|-------------|-------------|-------------|
| C | -1.83027600 | -0.41840400 | 0.07729600  |
| N | -0.93349400 | 0.66344000  | 0.40626200  |
| H | -1.39520600 | 1.53279200  | 0.64143800  |
| C | 0.33306400  | 0.86568700  | -0.11498600 |
| N | 1.07216800  | -0.28697400 | -0.34804500 |
| H | 2.01646300  | -0.09497000 | -0.64393000 |
| O | -2.00352800 | -0.82686200 | -1.08309000 |
| N | -2.84020700 | -0.48959500 | 1.03777600  |
| H | -2.53174500 | -0.48681000 | 1.99921100  |
| H | -3.53577700 | -1.19133700 | 0.82848300  |
| O | 0.81392700  | 1.97006100  | -0.27485500 |
| C | -0.48984700 | -1.95451600 | 0.37158500  |
| C | 0.72781100  | -1.58296700 | 0.01538300  |
| H | -0.94146800 | -2.91378600 | 0.55800000  |
| H | 1.56688200  | -2.27724100 | 0.03853800  |

Coordinates for TS **7a** → **8a**

0 2

|   |             |             |            |
|---|-------------|-------------|------------|
| C | -1.36030100 | -0.51699200 | 0.03473100 |
| C | -0.49047000 | 1.77817800  | 0.00158200 |

|   |             |             |             |
|---|-------------|-------------|-------------|
| C | 0.78409500  | 1.39494400  | -0.06664600 |
| C | 1.11048300  | -0.06045400 | -0.10759800 |
| N | -1.52991100 | 0.85516500  | 0.02969900  |
| O | -2.28012400 | -1.29015700 | 0.19350400  |
| N | -0.04696000 | -0.97823700 | -0.20981400 |
| H | 0.54131000  | -1.48713700 | 0.78578800  |
| H | -0.79599300 | 2.81579800  | 0.03099000  |
| H | 1.58615300  | 2.11855300  | -0.09702600 |
| N | 2.07673400  | -0.36055000 | -1.11191700 |
| H | 2.92505900  | 0.17938600  | -0.97762700 |
| H | 2.30762800  | -1.34905400 | -1.10117600 |
| O | 1.36057800  | -0.63718700 | 1.19355000  |
| H | -2.48361800 | 1.16624400  | 0.13367600  |

Coordinates for TS **8a** → **9a**

0 2

|   |             |             |             |
|---|-------------|-------------|-------------|
| C | 1.29692700  | -0.53548900 | -0.13085400 |
| C | 0.47407900  | 1.76555400  | -0.02732000 |
| C | -0.75628200 | 1.36287300  | 0.32280700  |
| C | -0.98476000 | -0.08085900 | 0.39715300  |
| N | 1.46556400  | 0.84887900  | -0.27293600 |
| O | 2.21509500  | -1.29505200 | -0.36273900 |
| N | 0.05892200  | -0.97391000 | 0.33080000  |
| H | -1.32633000 | -1.42933600 | -1.38265300 |
| H | 0.75325900  | 2.80728100  | -0.12106600 |
| H | -1.55422500 | 2.06097500  | 0.52592200  |
| N | -2.04480200 | -0.50816400 | 1.16565100  |
| H | -2.91222200 | -0.01158200 | 1.02294700  |
| H | -2.14949400 | -1.51322900 | 1.19135600  |
| O | -1.31448700 | -0.45879700 | -1.36616400 |
| H | 2.38628700  | 1.14301900  | -0.56055000 |

Coordinates for TS **7a** → **10a**

0 2

|   |             |             |             |
|---|-------------|-------------|-------------|
| C | -1.47357600 | -0.48169600 | 0.10150500  |
| C | -0.55938200 | 1.78133700  | 0.14069300  |
| C | 0.68789300  | 1.36498500  | 0.39231600  |
| C | 0.99107400  | -0.08468100 | 0.40141000  |
| N | -1.59249300 | 0.89234100  | -0.08686300 |
| O | -2.41719800 | -1.23878600 | 0.01520500  |
| N | -0.19309300 | -0.87498300 | 0.42997000  |
| H | -0.07407700 | -1.86091600 | 0.61523200  |
| H | -0.83140400 | 2.82867700  | 0.10547400  |
| H | 1.49907300  | 2.05129800  | 0.58228900  |
| N | 1.72115100  | -0.39157200 | -1.25207000 |
| H | 2.60557600  | 0.12379300  | -1.27729700 |

|   |             |             |             |
|---|-------------|-------------|-------------|
| H | 1.98635300  | -1.38168300 | -1.25363200 |
| O | 2.02626200  | -0.56384100 | 0.97229700  |
| H | -2.52982100 | 1.21635600  | -0.26410900 |

Coordinates for TS **4** → **5b**

0 2

|   |             |             |             |
|---|-------------|-------------|-------------|
| C | 1.59348900  | -0.75017900 | 0.47835300  |
| N | 0.76298100  | 0.03695100  | -0.31819000 |
| H | 0.99966100  | 1.01121700  | -0.44127100 |
| C | -0.61371700 | -0.18627700 | -0.54802300 |
| N | -1.00782200 | -1.48577800 | -0.51580000 |
| H | -2.00413100 | -1.61629800 | -0.59899100 |
| H | -0.49884800 | -2.08253700 | 0.12915300  |
| O | 1.26747200  | -1.83142900 | 0.93770700  |
| N | 2.82207900  | -0.18585400 | 0.71147900  |
| H | 3.18727000  | 0.52239400  | 0.09509000  |
| H | 3.49542200  | -0.80103100 | 1.13950100  |
| O | -1.23370200 | 0.68993000  | -1.25690600 |
| C | -1.53436600 | 0.85891100  | 0.85785700  |
| C | -2.28174800 | 1.53884700  | 1.53971800  |
| H | -2.87237500 | 2.07478400  | 2.24503900  |

Coordinates for TS **5b** → **6b**

0 2

|   |             |             |             |
|---|-------------|-------------|-------------|
| C | 1.68296800  | -0.88406700 | -0.52018600 |
| N | 0.46253800  | -0.73005900 | -1.28219700 |
| H | 0.27627700  | 0.42234700  | -1.72765500 |
| C | -0.77086800 | -0.34073000 | -0.52950700 |
| N | -1.90215700 | -1.02305500 | -1.05304200 |
| H | -2.76066800 | -0.70438800 | -0.61854200 |
| H | -1.95428500 | -0.90641600 | -2.05931900 |
| O | 2.13708300  | -1.99392900 | -0.37978200 |
| N | 2.25172800  | 0.27599600  | -0.10143400 |
| H | 1.69465000  | 1.11608900  | -0.05557100 |
| H | 3.06246300  | 0.20005200  | 0.49275600  |
| O | -0.54618000 | 1.00866600  | -0.97027800 |
| C | -0.73561000 | -0.45356200 | 0.93011700  |
| C | -0.73968800 | -0.54081400 | 2.12642900  |
| H | -0.73405800 | -0.62387900 | 3.18610200  |

Coordinates for TS **6b** → **7b**

0 2

|   |             |             |             |
|---|-------------|-------------|-------------|
| C | -1.64093900 | -0.37784100 | -0.22877900 |
| N | -0.27328200 | -0.51160200 | -0.59368500 |
| H | 0.84015600  | 1.38264100  | -1.66696700 |
| C | 0.67375800  | -0.02797500 | 0.23624100  |

|   |             |             |             |
|---|-------------|-------------|-------------|
| N | 0.43479200  | 0.32360800  | 1.53367400  |
| H | 1.20391000  | 0.75045300  | 2.02720600  |
| H | -0.47257900 | 0.73018600  | 1.72023000  |
| O | -2.31467100 | -1.36600500 | -0.03344200 |
| N | -2.09061000 | 0.91239400  | -0.14371600 |
| H | -1.48928000 | 1.63535300  | -0.52354300 |
| H | -3.09016900 | 1.04339200  | -0.11776500 |
| O | 0.56076200  | 1.63652600  | -0.77417600 |
| C | 2.04119100  | -0.40314700 | -0.04624200 |
| C | 3.17804100  | -0.73165700 | -0.24552600 |
| H | 4.18070800  | -1.02803600 | -0.43754800 |

Coordinates for TS **7b** → **8b**

0 2

|   |             |             |             |
|---|-------------|-------------|-------------|
| C | -0.29791000 | -0.14751200 | -3.31330400 |
| C | 1.56649200  | 1.34831100  | -0.38831000 |
| C | -0.29909000 | -0.00053500 | -2.12094800 |
| H | -0.23959900 | -0.26300500 | -4.36842700 |
| N | 0.34836100  | 0.83264700  | 0.08784000  |
| O | 2.23541800  | 0.87234100  | -1.29573900 |
| N | -1.52709900 | -0.45440000 | -0.16983100 |
| H | -2.24676400 | -0.80473000 | -0.77852500 |
| H | -1.75049400 | -0.26587400 | 0.79466500  |
| N | 1.94300700  | 2.49614600  | 0.27226500  |
| H | 1.51767600  | 2.69544900  | 1.47863700  |
| H | 2.93905600  | 2.66382900  | 0.14719600  |
| N | 1.38623900  | 2.37902900  | 2.63042600  |
| H | 0.90801700  | 1.47748600  | 2.57620600  |
| H | 2.30322200  | 2.19264800  | 3.04056400  |
| C | -0.43216400 | 0.16454000  | -0.69346800 |

Coordinates for TS **8b** → **9b**

0 2

|   |             |             |             |
|---|-------------|-------------|-------------|
| C | -0.22018100 | 1.79998000  | -1.51352300 |
| C | 1.53900700  | -0.07763500 | -0.01914400 |
| C | -0.64533000 | -0.58156600 | -0.75679500 |
| C | -0.74198400 | 0.69335700  | -1.44245100 |
| H | -0.02299400 | 2.81968000  | -1.75298800 |
| N | 0.42909000  | -0.91042700 | -0.09495000 |
| N | 1.41247800  | 1.30605600  | -0.11307400 |
| H | 2.27473800  | 1.67311600  | -0.52081600 |
| O | 2.64444400  | -0.52198900 | 0.27551600  |
| N | -1.69271400 | -1.41644500 | -0.81905600 |
| H | -2.49875900 | -1.16405600 | -1.36430900 |
| H | -1.61863900 | -2.33100700 | -0.34618300 |
| N | -0.72293800 | -3.70354100 | 0.65372500  |



|   |             |             |            |
|---|-------------|-------------|------------|
| H | -0.97972700 | -3.91409200 | 1.61327900 |
| H | 0.07455900  | -3.06563500 | 0.67991600 |
| H | -0.41177200 | -4.57063300 | 0.22670100 |

Coordinates for TS **9b** → **9a**

0 2

|   |             |             |             |
|---|-------------|-------------|-------------|
| C | 0.26404500  | 0.47400800  | -0.25009900 |
| C | 0.21695600  | 2.81919000  | -0.11276200 |
| C | -1.19326500 | 2.82055900  | 0.16335300  |
| C | -1.83987200 | 1.64214800  | 0.22555000  |
| H | -2.90023000 | 1.54222400  | 0.42823900  |
| N | 0.86756200  | 3.99881200  | -0.17574900 |
| H | 0.36354400  | 4.86127300  | -0.02875600 |
| H | 1.85513300  | 3.99542700  | -0.36978800 |
| N | 0.88317200  | 1.69877400  | -0.30446000 |
| O | 0.80645600  | -0.59857800 | -0.41447600 |
| N | -1.13813000 | 0.49214600  | 0.02483000  |
| H | -1.58311800 | -0.41371700 | 0.06294500  |
| H | -1.66871600 | 4.08588200  | 0.32610900  |
| N | -1.93945700 | 5.26604400  | 0.44671600  |
| H | -2.70236500 | 5.38521200  | -0.22506500 |
| H | -2.38551600 | 5.29499000  | 1.36743300  |

Coordinates for TS **5b** → **11**

0 2

|   |             |             |             |
|---|-------------|-------------|-------------|
| C | 1.52390400  | -0.68093700 | 0.10521400  |
| N | 0.50476000  | 0.23710800  | 0.39597100  |
| H | 0.55177900  | 0.68951900  | 1.29756200  |
| C | -0.78655900 | 0.19755800  | -0.20006000 |
| N | -1.45952200 | -1.54770000 | 0.23446500  |
| H | -2.33546700 | -1.64758500 | -0.28630900 |
| H | -0.76389500 | -2.13995200 | -0.23480500 |
| O | 1.36995800  | -1.69879200 | -0.53561100 |
| N | 2.72389500  | -0.32436700 | 0.68677900  |
| H | 2.93316600  | 0.65708700  | 0.78908300  |
| H | 3.49981700  | -0.90700100 | 0.41116900  |
| O | -0.93544200 | -0.00439600 | -1.42281900 |
| C | -1.72497600 | 1.05171700  | 0.53918000  |
| C | -2.49530800 | 1.79477900  | 1.08365100  |
| H | -3.18608000 | 2.44214800  | 1.56710600  |

Coordinates for TS **11** → **12**

0 2

|   |             |             |             |
|---|-------------|-------------|-------------|
| C | 1.32534100  | 0.18232700  | 1.01467400  |
| N | 0.41233000  | 0.59539500  | 0.00398700  |
| H | -0.34276300 | -0.07139600 | -0.10990800 |

|   |             |             |             |
|---|-------------|-------------|-------------|
| C | 0.24091600  | 1.73185900  | -0.76709100 |
| O | 1.09159800  | -0.87461900 | 1.57392800  |
| N | 2.35982400  | 1.01704300  | 1.33193500  |
| H | 3.28520300  | 0.44457800  | 2.12367300  |
| H | 2.71990900  | 1.57623300  | 0.56370800  |
| O | -0.71250800 | 1.84531400  | -1.50991400 |
| C | 1.23866200  | 2.78912700  | -0.68763700 |
| C | 1.98221800  | 3.73346500  | -0.72539100 |
| H | 2.63799400  | 4.57072300  | -0.74933200 |
| N | 3.97101200  | -0.45776400 | 2.39100400  |
| H | 3.34185400  | -1.26270300 | 2.43564900  |
| H | 4.65503600  | -0.64090700 | 1.65620300  |

Coordinates for TS **12** → **13**

0 2

|   |             |             |             |
|---|-------------|-------------|-------------|
| C | 0.11777200  | 1.38807400  | -1.82232900 |
| C | 1.13661900  | -0.49386900 | 0.29494100  |
| C | -1.14293500 | -0.61551600 | -0.81289800 |
| C | -0.70366900 | 0.50116200  | -1.63866100 |
| H | 0.62215200  | 2.25121700  | -2.19368700 |
| N | -0.17190400 | -0.97572600 | 0.11996800  |
| H | -0.37776100 | -1.81517700 | 0.64896900  |
| N | 1.43295700  | 0.77335200  | -0.16445000 |
| H | 2.39201300  | 0.77894400  | -0.51592200 |
| O | -2.20485100 | -1.18260000 | -0.90220500 |
| O | 1.94331400  | -1.13695700 | 0.94279400  |

Coordinates for TS **13-NH<sub>3</sub>** → **10a**

0 2

|   |             |             |             |
|---|-------------|-------------|-------------|
| C | 0.09248900  | 1.85792700  | 0.35740100  |
| C | 1.06385100  | -0.35345200 | -0.00903000 |
| C | -1.38473800 | 0.08147000  | -0.41387200 |
| C | -1.12922600 | 1.45548100  | -0.01689900 |
| H | 0.31977300  | 2.87113500  | 0.66924700  |
| N | -0.22333700 | -0.72008400 | -0.37714400 |
| H | -0.33555900 | -1.68828300 | -0.65155100 |
| N | 1.16344900  | 0.98485600  | 0.36269100  |
| H | 2.08776900  | 1.28748200  | 0.63148600  |
| O | -2.45188900 | -0.39361000 | -0.75307600 |
| O | 2.00844900  | -1.10999500 | -0.00600500 |
| H | -2.26453600 | 2.33228800  | -0.12757000 |
| N | -3.40122200 | 2.56348100  | -0.06412600 |
| H | -3.80202400 | 1.74328900  | -0.53044600 |
| H | -3.62644200 | 2.43060300  | 0.92559200  |

Coordinates for TS 2 → 14

0 2

|   |             |             |             |
|---|-------------|-------------|-------------|
| C | 0.18446700  | -0.65964800 | -1.31754600 |
| N | 0.69266600  | -0.96471300 | -0.04618700 |
| H | 0.55723300  | -1.95296400 | 0.17423800  |
| N | -1.04479100 | -1.23770100 | -1.59447300 |
| H | -1.54839800 | -0.79101400 | -2.34739100 |
| O | 0.73957200  | 0.08784400  | -2.10378700 |
| H | -1.61440600 | -1.55772600 | -0.82565800 |
| C | 2.82615300  | -0.90981400 | -0.32319300 |
| C | 3.40877400  | -1.76681500 | 0.31804700  |
| H | 3.80417600  | -2.53570000 | 0.93770200  |
| H | 2.63916600  | -0.11523800 | -1.01608700 |

Coordinates for TS 15 → 16

0 2

|   |             |             |             |
|---|-------------|-------------|-------------|
| C | -0.88096700 | -0.13352400 | 0.79656800  |
| N | 0.37604500  | -0.55623000 | 0.37743000  |
| H | 1.05367500  | 0.19347700  | 0.35241600  |
| N | -1.86731000 | -1.11340300 | 0.84759200  |
| H | -1.54110000 | -1.98306700 | 1.26464000  |
| O | -1.07577000 | 1.04565000  | 1.04845200  |
| C | 0.72645800  | -1.78742100 | -0.17038700 |
| C | 1.96297800  | -2.14534600 | -0.52271600 |
| H | 2.81458000  | -1.48646000 | -0.39460800 |
| H | 2.14217900  | -3.11556800 | -0.96363000 |
| H | -0.11133600 | -2.45735100 | -0.32355800 |
| H | -2.98610900 | -0.67606300 | 1.41250300  |
| N | -3.55069700 | -0.08524100 | 2.25988700  |
| H | -3.37695200 | -0.50944800 | 3.17241900  |
| H | -3.08758700 | 0.82760200  | 2.26383900  |

Coordinates for TS 16 → 17

0 2

|   |             |             |             |
|---|-------------|-------------|-------------|
| C | -1.10901600 | 0.32730600  | 0.20047000  |
| N | 0.18518500  | -0.16509900 | 0.29087100  |
| H | 0.30928600  | -1.10756900 | 0.63224900  |
| N | -2.06173700 | -0.63280500 | 0.51650200  |
| H | -2.97797500 | -0.27878600 | 0.25206700  |
| O | -1.36633000 | 1.48679800  | -0.07837500 |
| C | 1.30660700  | 0.61430800  | 0.03468100  |
| C | 2.56937600  | 0.19572200  | 0.14848600  |
| H | 2.82231200  | -0.81007100 | 0.46625300  |
| H | 3.38496900  | 0.86847300  | -0.07552200 |
| H | 1.05021500  | 1.62002100  | -0.27409000 |

|   |             |             |             |
|---|-------------|-------------|-------------|
| H | -1.82761500 | -1.78667100 | 0.07240700  |
| N | -1.70561300 | -2.69948200 | -0.75581800 |
| H | -2.64075700 | -3.03545600 | -0.99731300 |
| H | -1.32090200 | -2.31149900 | -1.61954200 |

Coordinates for TS **17** → **18**

0 2

|   |             |             |             |
|---|-------------|-------------|-------------|
| C | 0.39827100  | -0.94201200 | -1.53621100 |
| N | 1.02872900  | -0.55615900 | -0.30117500 |
| H | 1.99765900  | -0.27741800 | -0.34978700 |
| N | -0.94915500 | -0.78933200 | -1.43628900 |
| H | -1.46084300 | -1.44584900 | -2.02037100 |
| O | 1.06418900  | -1.25801600 | -2.50328900 |
| C | 0.19340800  | -0.19773700 | 0.71248700  |
| C | -1.03556100 | -0.82336700 | 0.70736000  |
| H | -1.11316200 | -1.88526800 | 0.52021800  |
| H | -1.87825800 | -0.36619600 | 1.21188400  |
| H | 0.43252700  | 0.66818000  | 1.32113600  |

Coordinates for TS **18** → **19**

0 2

|   |             |             |             |
|---|-------------|-------------|-------------|
| C | 1.73274600  | -0.40568700 | 0.33850100  |
| N | 0.57777100  | -0.58324400 | 1.10357200  |
| H | 0.36544800  | -1.51257200 | 1.42944600  |
| N | 1.55395200  | 0.79266800  | -0.32437300 |
| H | 2.35534500  | 1.25180700  | -0.72458000 |
| O | 2.68424700  | -1.15027200 | 0.28409800  |
| C | -0.45367600 | 0.35782100  | 0.75671500  |
| C | 0.38116100  | 1.50687600  | 0.14897800  |
| H | 0.63048200  | 2.24431700  | 0.92300800  |
| C | -1.57584800 | -0.22213300 | -0.23573600 |
| N | -2.73115800 | 0.69824500  | -0.13446800 |
| H | -3.46644100 | 0.31237800  | -0.72257300 |
| H | -2.48379300 | 1.61023600  | -0.51037200 |
| H | -1.03149400 | 0.67903000  | 1.62975900  |
| H | -0.13871100 | 2.00440800  | -0.66981900 |
| O | -1.10811200 | -0.22064000 | -1.49048700 |
| N | -2.07483800 | -1.52900400 | 0.16419500  |
| H | -1.41703800 | -2.25578500 | -0.08931400 |
| H | -2.30996800 | -1.58152700 | 1.14898500  |

Coordinates for TS **19** → **20**

0 2

|   |            |             |            |
|---|------------|-------------|------------|
| C | 1.78637800 | -0.68402700 | 0.22388600 |
| N | 0.44539600 | -1.08966200 | 0.22197500 |
| H | 0.25391400 | -1.98486700 | 0.64799700 |

|   |             |             |             |
|---|-------------|-------------|-------------|
| N | 1.77113400  | 0.69790100  | 0.20847500  |
| H | 2.59405900  | 1.17193700  | -0.12833300 |
| O | 2.75432100  | -1.40985200 | 0.23277300  |
| C | -0.44513800 | 0.04186500  | 0.47310000  |
| C | 0.42848600  | 1.22209300  | -0.01258800 |
| H | 0.23707300  | 2.12501500  | 0.56489500  |
| C | -1.79388000 | -0.13838300 | -0.24897300 |
| O | -2.78670100 | -0.61987700 | 0.38222900  |
| N | -2.47966700 | 1.60038500  | -0.03905100 |
| H | -3.27672200 | 1.59082900  | -0.68091800 |
| H | -2.88426400 | 1.65855900  | 0.89981000  |
| H | -0.68098500 | 0.14625600  | 1.53789600  |
| H | 0.22971900  | 1.44105900  | -1.06795400 |
| N | -1.69042900 | -0.33777800 | -1.62740900 |
| H | -0.77459000 | -0.63396300 | -1.93627900 |
| H | -2.43339500 | -0.92574500 | -1.97975000 |

Coordinates for TS **20** → **21**

0 2

|   |             |             |             |
|---|-------------|-------------|-------------|
| C | 1.83078100  | -0.51118300 | -0.10837500 |
| N | 0.54286000  | -0.92060200 | 0.15370900  |
| H | 0.35686000  | -1.85063800 | 0.49450600  |
| N | 1.76952100  | 0.89035200  | -0.15142600 |
| H | 2.54311300  | 1.39723300  | -0.55183400 |
| O | 2.81967000  | -1.18531000 | -0.27721600 |
| C | -0.32661500 | 0.19291100  | 0.51061600  |
| C | 0.43293100  | 1.37446700  | -0.11820100 |
| H | 0.30923200  | 2.32295800  | 0.40818800  |
| C | -1.78840000 | -0.15399500 | 0.15600400  |
| O | -2.27143400 | -1.12902200 | 0.70681300  |
| N | -2.45995800 | 0.65935800  | -0.68939200 |
| H | -3.39749400 | 0.35854100  | -0.91598300 |
| H | -1.98277600 | 1.27130900  | -1.35641900 |
| H | -0.34179100 | 0.33885000  | 1.60192100  |
| H | -0.00346500 | 1.61760400  | -1.25033700 |
| N | -0.62236000 | 1.99213900  | -2.49978200 |
| H | -0.20008300 | 2.91550100  | -2.63297600 |
| H | -0.10892700 | 1.37178400  | -3.13320900 |

Coordinates for TS **21** → **22**

0 2

|   |            |             |             |
|---|------------|-------------|-------------|
| C | 1.98971700 | -0.33616300 | -0.02546500 |
| N | 0.70602800 | -0.84671700 | -0.02353700 |
| H | 0.48545500 | -1.82676700 | 0.05162200  |
| N | 1.77316500 | 1.04569700  | -0.20904200 |
| H | 2.53893700 | 1.69654200  | -0.26917100 |

|   |             |             |             |
|---|-------------|-------------|-------------|
| O | 3.05145800  | -0.90182900 | 0.09427200  |
| C | -0.25410500 | 0.15442600  | -0.13972800 |
| C | 0.43793300  | 1.33159600  | -0.32766800 |
| H | 0.06466500  | 2.32311800  | -0.51649800 |
| C | -1.64686100 | -0.22370900 | -0.50346300 |
| O | -1.91096300 | -1.37053000 | -0.81272500 |
| N | -2.55979800 | 0.79950500  | -0.51109000 |
| H | -3.51751600 | 0.51062300  | -0.64725700 |
| H | -2.41964300 | 1.56895000  | 0.12595500  |
| H | -0.80128500 | 0.48638900  | 1.71624100  |

Coordinates for TS **22** → **23**

0 2

|   |             |             |             |
|---|-------------|-------------|-------------|
| C | 2.11164100  | -0.07897800 | 0.23385300  |
| N | 0.83354100  | -0.60800600 | 0.23323100  |
| H | 0.60583800  | -1.56865000 | 0.43651500  |
| N | 1.88478000  | 1.26885000  | -0.09913300 |
| H | 2.64074200  | 1.92880300  | -0.17663800 |
| O | 3.17339300  | -0.61343900 | 0.46535500  |
| C | -0.12364100 | 0.35098500  | -0.07739100 |
| C | 0.54312900  | 1.51999000  | -0.29069200 |
| H | 0.17389900  | 2.48993200  | -0.57688500 |
| C | -1.54334800 | -0.04502300 | -0.15464400 |
| O | -1.84958300 | -1.20546900 | 0.10918500  |
| N | -2.43387100 | 0.89581400  | -0.60357600 |
| H | -3.70336900 | 0.58457100  | -0.38231400 |
| H | -2.17200700 | 1.85530100  | -0.39139400 |
| N | -4.57349900 | 0.13526300  | 0.28042700  |
| H | -4.23801600 | -0.79617300 | 0.53920200  |
| H | -4.69117700 | 0.66179600  | 1.14733800  |

Coordinates for TS **23** → **24**

0 2

|   |             |             |             |
|---|-------------|-------------|-------------|
| C | -0.34782900 | -0.92629400 | -0.17285500 |
| C | 2.80362500  | -0.56152100 | 1.69721200  |
| C | 0.43390300  | 0.97743100  | 1.40467600  |
| C | -0.23188800 | 0.36447200  | 0.26292700  |
| N | 1.26886000  | 0.15359100  | 2.18132400  |
| N | 3.25379000  | -1.33036800 | 2.79126000  |
| H | 3.54113100  | -0.74792700 | 3.56583600  |
| O | 0.18330300  | 2.13376400  | 1.71807200  |
| N | -1.06168100 | 1.13916000  | -0.54291900 |
| N | -1.21911600 | -0.92230700 | -1.23113800 |
| C | -1.70794600 | 0.37492500  | -1.49519300 |
| O | -2.49652900 | 0.70150900  | -2.35278200 |
| H | -1.51972800 | -1.71936400 | -1.76804900 |

|   |             |             |             |
|---|-------------|-------------|-------------|
| H | 0.15159600  | -1.80482700 | 0.19420200  |
| H | 1.52001800  | 0.70832600  | 3.00082900  |
| H | -1.21388400 | 2.12536500  | -0.40068800 |
| H | 2.60483800  | -2.05158900 | 3.07876300  |
| N | 2.55160800  | -1.40863600 | 0.57258400  |
| H | 2.58192900  | -0.85197700 | -0.27430200 |
| H | 3.27793100  | -2.11517200 | 0.53376200  |
| O | 3.34704200  | 0.59905000  | 1.52317100  |

Coordinates for TS **24** → **25**

0 2

|   |             |             |             |
|---|-------------|-------------|-------------|
| C | -1.94871300 | 1.05367200  | 1.08259500  |
| C | 1.06196000  | 1.77041500  | -0.27890800 |
| C | 0.23653200  | -0.36389200 | 0.92653300  |
| C | -1.20583300 | -0.08297300 | 0.96490200  |
| N | 1.13428800  | 0.64625000  | 0.61636100  |
| N | 0.18191500  | 1.62238100  | -1.34820200 |
| H | 0.17626400  | 2.42510700  | -1.96077400 |
| O | 0.63904400  | -1.47586700 | 1.23358200  |
| N | -2.08931500 | -1.15742200 | 1.07134700  |
| N | -3.26110300 | 0.66835200  | 1.24772200  |
| C | -3.39077900 | -0.73280700 | 1.26515300  |
| O | -4.40490200 | -1.37857200 | 1.40878800  |
| H | -4.05350400 | 1.27380100  | 1.38407700  |
| H | -1.61756900 | 2.07888800  | 1.09781400  |
| H | 2.09452100  | 0.35823000  | 0.75703600  |
| H | -1.79155300 | -2.11909500 | 1.11664200  |
| H | -0.73801000 | 1.26545200  | -1.13220900 |
| N | 0.48950400  | 3.12417100  | 0.79467700  |
| H | 1.12887100  | 3.14846400  | 1.59224000  |
| H | 0.63912500  | 3.99729800  | 0.28270000  |
| O | 2.16597900  | 2.38026900  | -0.47497100 |

Coordinates for TS **25** → **26**

0 2

|   |             |             |             |
|---|-------------|-------------|-------------|
| C | 0.85119500  | -0.97042900 | -0.63011600 |
| C | -2.62675800 | -0.67504100 | -0.24436900 |
| C | -0.70110100 | 1.04540600  | -0.15419300 |
| C | 0.47866200  | 0.18508500  | -0.00968100 |
| N | -1.88731400 | 0.47917800  | -0.63704700 |
| N | -2.09333000 | -1.48228700 | 0.72308200  |
| H | -1.07948000 | -1.52749100 | 0.75922600  |
| O | -0.61524300 | 2.24226300  | 0.05055900  |
| O | -3.73542700 | -0.82486200 | -0.72599400 |
| N | 1.58554300  | 0.63492600  | 0.70611700  |
| N | 2.15822500  | -1.22269300 | -0.28020300 |

|   |             |             |             |
|---|-------------|-------------|-------------|
| C | 2.67158000  | -0.21099200 | 0.55484600  |
| O | 3.78623600  | -0.13033700 | 1.01568100  |
| H | 2.73191800  | -1.98641200 | -0.59826900 |
| H | 0.30042700  | -1.58901800 | -1.31786500 |
| H | -2.51800200 | 1.18413000  | -1.00264800 |
| H | 1.62731200  | 1.52411400  | 1.17854000  |
| H | -2.76489100 | -2.64229600 | 0.89303000  |
| N | -3.29661800 | -3.57436700 | 0.45013700  |
| H | -3.96598300 | -3.19742700 | -0.22486100 |
| H | -2.64895300 | -4.17815200 | -0.05656300 |

Coordinates for TS **26** → **27**

0 2

|   |             |             |             |
|---|-------------|-------------|-------------|
| C | 0.42592900  | 2.20826000  | -0.64621700 |
| C | 1.17924800  | -0.48105400 | 0.18377800  |
| C | -1.01187400 | 0.08057300  | -0.94419900 |
| C | -0.78011300 | 1.51224200  | -0.70277900 |
| N | 0.09268600  | -0.71362100 | -0.72292600 |
| N | 1.10777300  | 0.68238800  | 0.88214900  |
| H | 2.03372000  | 0.92209900  | 1.23464600  |
| O | -2.09271600 | -0.33663400 | -1.31907400 |
| O | 2.01795100  | -1.35644800 | 0.31467000  |
| N | -1.76506700 | 2.36343800  | -0.28479400 |
| N | 0.12264500  | 3.47401200  | -0.22438300 |
| C | -1.24963200 | 3.61666300  | 0.05267900  |
| O | -1.82718300 | 4.58799600  | 0.46762200  |
| H | 0.76706100  | 4.23873900  | -0.10349100 |
| H | 1.35174900  | 1.97900700  | -1.14231200 |
| H | -0.00339900 | -1.68207600 | -1.00214200 |
| H | -2.73351000 | 2.10536300  | -0.16579200 |

Coordinates for TS **27** → **28**

0 2

|   |             |             |             |
|---|-------------|-------------|-------------|
| C | -0.27686600 | -0.74250900 | -0.14822700 |
| C | 2.12755900  | -0.70133800 | -0.33878300 |
| C | 0.81248700  | 1.46629600  | -0.25078300 |
| C | -0.35752800 | 0.63574000  | -0.17351000 |
| N | 1.98817000  | 0.68173600  | -0.28793000 |
| N | 0.91258800  | -1.39712000 | -0.36950700 |
| H | 0.99745700  | -2.39596700 | -0.25144700 |
| O | 0.84413400  | 2.68033800  | -0.28611300 |
| O | 3.19498000  | -1.26689900 | -0.36627900 |
| N | -1.69630200 | 0.96917700  | -0.26744000 |
| N | -1.54821600 | -1.23351000 | -0.35304500 |
| C | -2.48762000 | -0.17070000 | -0.32851000 |
| O | -3.68803400 | -0.26699900 | -0.35081800 |



|   |             |             |             |
|---|-------------|-------------|-------------|
| H | -1.85439900 | -2.18278100 | -0.20798400 |
| H | -0.25793800 | -0.68130200 | 1.80565800  |
| H | 2.85991900  | 1.19540200  | -0.30743100 |
| H | -2.07403000 | 1.90034300  | -0.19481300 |

Coordinates for TS **24** → **29**

0 2

|   |             |             |             |
|---|-------------|-------------|-------------|
| C | -1.64678300 | 1.26166400  | 0.42534400  |
| C | 2.66392200  | 0.16982700  | 0.14926700  |
| C | 0.23391900  | -0.49746200 | 0.06866400  |
| C | -1.12777700 | 0.05670100  | 0.06557200  |
| N | 1.23927500  | 0.43628700  | 0.24682300  |
| N | 3.51090900  | 1.21406800  | 0.75876400  |
| H | 3.94235200  | 1.23291600  | -0.43559000 |
| O | 0.40298400  | -1.70089900 | -0.06770500 |
| N | -2.19721900 | -0.75121100 | -0.31014800 |
| N | -3.01354700 | 1.18615900  | 0.25741700  |
| C | -3.40559000 | -0.08516500 | -0.19860100 |
| O | -4.52828000 | -0.47359200 | -0.43075500 |
| H | -3.68722000 | 1.90660800  | 0.45731300  |
| H | -1.16022800 | 2.13943500  | 0.81483600  |
| H | 1.00748200  | 1.35329600  | -0.11044900 |
| H | -2.10281900 | -1.71786300 | -0.57821300 |
| H | 2.94368800  | 2.04739800  | 0.93770900  |
| N | 2.99358700  | -1.11174300 | 0.63735800  |
| H | 2.41064700  | -1.83466800 | 0.22875400  |
| H | 3.97975500  | -1.29216500 | 0.49917300  |
| O | 3.16863700  | 0.56846700  | -1.13577900 |

Coordinates for TS **29** → **30-OH**

0 2

|   |             |             |             |
|---|-------------|-------------|-------------|
| C | -1.60298100 | 1.33609200  | 0.00162200  |
| C | 2.69976300  | 0.33811500  | 0.27345000  |
| C | 0.31273200  | -0.37406200 | 0.39892000  |
| C | -1.05537700 | 0.10115000  | 0.16948300  |
| N | 1.30211200  | 0.58682300  | 0.27005900  |
| N | 3.58986900  | 1.34352400  | 0.16337900  |
| H | 3.80947000  | -0.02099400 | -1.75469700 |
| O | 0.51254700  | -1.54183000 | 0.70581800  |
| N | -2.10358800 | -0.81466000 | 0.14654500  |
| N | -2.96326600 | 1.16671100  | -0.13139300 |
| C | -3.32455600 | -0.19037400 | -0.03869700 |
| O | -4.43527000 | -0.66526800 | -0.10846100 |
| H | -3.65177400 | 1.88978700  | -0.25878000 |
| H | -1.14085600 | 2.30862800  | -0.00511500 |
| H | 1.06023900  | 1.36370100  | -0.32788300 |

|   |             |             |             |
|---|-------------|-------------|-------------|
| H | -1.98501300 | -1.80699200 | 0.27441600  |
| H | 3.12742300  | 2.18322800  | -0.18018600 |
| N | 3.09886800  | -0.76993300 | 0.94615400  |
| H | 4.09569500  | -0.91285900 | 0.96375500  |
| H | 2.48463500  | -1.57297600 | 0.91319600  |
| O | 2.86592400  | 0.14508100  | -1.61920000 |

Coordinates for TS **30** → **31**

0 2

|   |             |             |             |
|---|-------------|-------------|-------------|
| C | -1.41616700 | 1.52408500  | 0.16035400  |
| C | 1.55585400  | 2.17786900  | -0.22690200 |
| C | 0.65161500  | -0.08738300 | 0.16789800  |
| C | -0.75566700 | 0.33384500  | 0.06869400  |
| N | 1.63402900  | 0.87035600  | 0.31665600  |
| N | 1.45234500  | 3.23599700  | 0.48416000  |
| O | 0.90458300  | -1.29099700 | 0.17269500  |
| N | -1.72724700 | -0.65256300 | -0.10809800 |
| N | -2.75991300 | 1.25650500  | 0.02848800  |
| C | -3.00156000 | -0.12027900 | -0.13177600 |
| O | -4.07224900 | -0.67198600 | -0.26175000 |
| H | -3.51120800 | 1.92567500  | 0.06171700  |
| H | -1.03009300 | 2.51630500  | 0.31663800  |
| H | 2.78103800  | 0.36277400  | 0.33389300  |
| H | -1.51386400 | -1.63618800 | -0.15389000 |
| H | 1.49753100  | 2.98899300  | 1.47063400  |
| N | 1.69466600  | 2.25269500  | -1.59637900 |
| H | 1.53014600  | 3.16817600  | -1.98957800 |
| H | 1.35081500  | 1.47835600  | -2.14242000 |
| N | 3.70939300  | -0.37352700 | -0.05068900 |
| H | 3.30323600  | -1.31254800 | -0.08784400 |
| H | 3.99918000  | -0.13289800 | -1.00120800 |

Coordinates for TS **31** → **32**

0 2

|   |             |             |             |
|---|-------------|-------------|-------------|
| C | 0.70439600  | 2.34266800  | 0.19451100  |
| C | 1.44873800  | 0.46705000  | -1.67175300 |
| C | -0.71020100 | 0.37050800  | -0.77795500 |
| C | -0.50288800 | 1.69533700  | -0.12667500 |
| N | 0.38779200  | -0.24230700 | -1.30568600 |
| N | 1.51818800  | 1.81762400  | -1.73280200 |
| H | 2.48450100  | 2.13957600  | -1.77760600 |
| O | -1.85073600 | -0.06941700 | -0.81504000 |
| N | -1.48264000 | 2.64481500  | -0.10202600 |
| N | 0.38459500  | 3.65018500  | 0.44661900  |
| C | -0.98395600 | 3.90337400  | 0.23095800  |
| O | -1.56525300 | 4.95430900  | 0.32632600  |

|   |             |             |             |
|---|-------------|-------------|-------------|
| H | 1.01329600  | 4.37852700  | 0.74425500  |
| H | 1.58728300  | 1.89598400  | 0.61864500  |
| N | 2.54923500  | -0.28153100 | -2.03486400 |
| H | 2.33755500  | -1.25433800 | -2.20590900 |
| H | 3.20450600  | 0.13385000  | -2.67931900 |
| H | -2.43597100 | 2.46121400  | -0.38134000 |

Coordinates for TS **32** → **33**

0 2

|   |             |             |             |
|---|-------------|-------------|-------------|
| C | 0.28040300  | -0.96422800 | 0.47322400  |
| C | -2.05104500 | -0.54699900 | -0.03053600 |
| C | -0.76419600 | 1.38277500  | 0.19158500  |
| C | 0.37815300  | 0.52207600  | 0.55624100  |
| N | -1.99825400 | 0.74712100  | 0.03289100  |
| N | -0.98582500 | -1.43960000 | 0.03916300  |
| H | -1.23512300 | -2.37278700 | 0.33612000  |
| O | -0.61355200 | 2.57907000  | 0.03363400  |
| N | 1.70502500  | 0.81784100  | 0.20250000  |
| N | 1.49575900  | -1.37603100 | -0.12332500 |
| C | 2.41261600  | -0.30038300 | -0.19856500 |
| O | 3.57067100  | -0.37606600 | -0.52188500 |
| H | 1.89229400  | -2.29264600 | 0.02086300  |
| H | 0.30145300  | -0.24790700 | 1.63086300  |
| N | -3.27638700 | -1.15038700 | -0.14828000 |
| H | -4.01923800 | -0.49837900 | -0.35378700 |
| H | -3.32797400 | -2.03022500 | -0.64002700 |
| H | 2.08382700  | 1.75038200  | 0.18212000  |

Coordinates for TS **33** → **34**

0 2

|   |             |             |             |
|---|-------------|-------------|-------------|
| C | 0.21669700  | -0.92349100 | 0.09829900  |
| C | -2.00600500 | -0.58502800 | -0.12264600 |
| C | -0.72791000 | 1.34753100  | 0.02712600  |
| C | 0.33966900  | 0.44414900  | 0.68894300  |
| N | -1.94326500 | 0.72539400  | -0.13780400 |
| N | -0.92127600 | -1.48906500 | -0.17296100 |
| H | -1.31704700 | -2.83332400 | 0.64520700  |
| O | -0.48627500 | 2.50541700  | -0.22315400 |
| N | 1.73789500  | 0.73397400  | 0.48780400  |
| N | 1.46475400  | -1.38549100 | -0.14020400 |
| C | 2.43376600  | -0.33074500 | -0.01998700 |
| O | 3.59161500  | -0.42464600 | -0.32595300 |
| H | 1.68094100  | -2.23254000 | -0.64532700 |
| H | 0.07763300  | 0.40667400  | 1.75858900  |
| N | -3.20637900 | -1.18134700 | -0.16430900 |
| H | -4.02871600 | -0.60253500 | -0.19439200 |

|   |             |             |             |
|---|-------------|-------------|-------------|
| H | -3.27310700 | -2.18517400 | -0.19203100 |
| H | 2.12304900  | 1.66426500  | 0.50914600  |

Coordinates for TS **34-NH<sub>2</sub>** → **35**

0 2

|   |             |             |             |
|---|-------------|-------------|-------------|
| C | 0.25036800  | -0.94603900 | 0.05730100  |
| C | -1.89768400 | -0.33462500 | 0.12672900  |
| C | -0.40710800 | 1.42660700  | 0.39018300  |
| C | 0.61673600  | 0.34039600  | 0.70047500  |
| N | -1.69750600 | 0.95335100  | 0.32038600  |
| N | -0.95935000 | -1.33486000 | -0.15863800 |
| O | -0.07827500 | 2.59198300  | 0.32116100  |
| N | 1.99696000  | 0.47729700  | 0.37239700  |
| N | 1.40742800  | -1.55527000 | -0.29900300 |
| C | 2.52147000  | -0.66930100 | -0.17556600 |
| O | 3.65004800  | -0.91410200 | -0.50929100 |
| H | 1.47359500  | -2.42233100 | -0.81116900 |
| H | 0.48618000  | 0.15139300  | 1.87883800  |
| N | -3.16385800 | -0.79251800 | 0.13430000  |
| H | -3.91522200 | -0.12691500 | 0.20797700  |
| H | -3.34216600 | -1.74144400 | -0.14756500 |
| H | 2.55381900  | 1.29646800  | 0.55217500  |
| N | 0.22975100  | 0.14628500  | 3.37857100  |
| H | 0.58940600  | 1.07514900  | 3.63493300  |
| H | -0.78991200 | 0.27717300  | 3.40892400  |

Coordinates for TS **35** → **36-NH<sub>2</sub>**

0 2

|   |             |             |             |
|---|-------------|-------------|-------------|
| C | 0.11839400  | -0.74716100 | -0.04434400 |
| C | -2.08031800 | -0.42020700 | -0.14388500 |
| C | -0.71162300 | 1.57331900  | 0.12065200  |
| C | 0.37113500  | 0.62431900  | 0.09797600  |
| N | -1.94030100 | 0.92395400  | -0.03223200 |
| N | -1.07210500 | -1.31734300 | -0.14213600 |
| O | -0.59695700 | 2.78507600  | 0.23147500  |
| N | 1.73174200  | 0.79659700  | 0.12851400  |
| N | 1.34406000  | -1.37047900 | -0.05933300 |
| C | 2.38902000  | -0.43620700 | 0.04534600  |
| O | 3.57538600  | -0.65163300 | 0.06582500  |
| H | 1.50537000  | -2.36109100 | -0.15031700 |
| N | -3.33783700 | -0.87513300 | -0.28463400 |
| H | -4.09394700 | -0.19665500 | -0.11246400 |
| H | -3.47930400 | -1.86783200 | -0.19087500 |
| H | 2.21384500  | 1.67282400  | 0.25880400  |
| H | -2.96221900 | 1.46707100  | 0.09215400  |
| N | -4.37340500 | 1.70850500  | 0.29889100  |

|   |             |            |             |
|---|-------------|------------|-------------|
| H | -4.61295300 | 2.07903800 | 1.21843900  |
| H | -4.84788500 | 2.30852900 | -0.37575000 |
